# Supplementary material
Source: ML conference proceedings conference paper supplement (https://openreview.net/forum?id=dRjt4vlYVQ)
Supplement: supplementary_material [file Weaver_Supplementary.pdf › Weaver_NeuRIPS_Supplementary/Weaver_Supplementary.pdf]

---

# Shrinking the Generation-Verification Gap with Weak Verifiers

---

Anonymous Author(s)

Affiliation

Address

email

## Abstract

Verifiers can improve language model (LM) capabilities by providing feedback or selecting the best response from a pool of generated candidates. Currently, high-quality verifiers are either unscalable (e.g., humans) or limited in utility (e.g., tools like Lean for formal proofs). While LM judges and reward models have become broadly useful as general-purpose verifiers, a significant performance gap remains between them and oracle verifiers. To help close this gap, we introduce WEAVER, a framework for designing a strong verifier by combining multiple weak, imperfect verifiers. First we find that weighted ensembles of verifiers, which typically require learning from labeled data, significantly outperform unweighted combinations due to differences in the verifiers. To reduce the dependency on labeled data, WEAVER leverages weak supervision to estimate each verifier’s accuracy and combines their outputs into a unified score that better reflects true response quality. However, directly applying weak supervision algorithms poses several challenges, including inconsistent verifier output formats and handling low-quality verifiers. WEAVER addresses these challenges by using dataset statistics to normalize outputs and filter specific verifiers. We study the effectiveness of WEAVER in repeated sampling settings, where a model generates multiple candidate responses at test time and a verifier is used to select the correct one. Our evaluations demonstrate that WEAVER significantly improves the *pass@1* performance across several reasoning and math tasks, achieving o3-mini-level accuracy with Llama 3.3 70B Instruct (a much cheaper non-reasoning model) as the generator, and an ensemble of smaller judge and reward models as the verifiers (86.2% average). This gain mirrors the jump achieved between GPT-4o and o3-mini (69.0% vs. 86.7%), which required extensive finetuning and post-training interventions. To make WEAVER more efficient, we train a compact 400M cross-encoder using WEAVER’s combined output scores. This distilled model retains 98.7% of WEAVER’s full accuracy while reducing verification compute by up to 99.97%.

## 1 Introduction

A core challenge in deploying language models (LMs) is *verification*: determining the quality or correctness of a model’s response. This problem arises across various components of the LM pipeline, including dataset curation, model alignment, and informed inference-time decision-making. A *verifier* is a function that scores responses. When combined with repeated sampling—generating multiple candidate responses from a LM—a strong verifier can be used to select a correct candidate response, significantly enhancing model capability on tasks such as math, code, and reasoning [5, 55, 70]. However, without a perfect verifier, a *generation-verification gap* emerges [72]: a LM can generate a correct response, but we fail to identify it.

In some settings, we have access to *oracle verifiers* that can perfectly identify correct responses. A prominent example is Lean, a formal theorem prover that can be used for problems such MiniF2F [94].

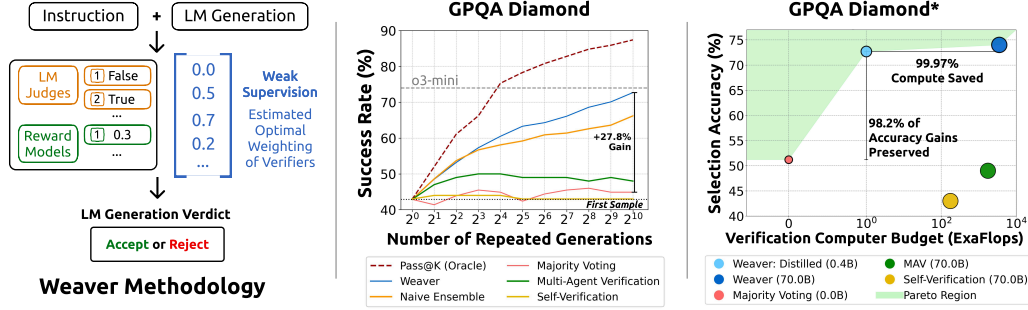

Figure 1: **WEAVER Framework:** We propose WEAVER, a framework combining multiple weak verifiers to effectively scale repeated sampling without parameter finetuning on ground truth labels (left). WEAVER significantly outperforms majority voting and shrinks a model’s *generation-verification gap* by 14.5%, on average, for GPQA Diamond and other datasets (Table 1) (middle). By distilling WEAVER from an ensemble of 70B verifiers to a single 400M cross-encoder, we can preserve 98.2% of the accuracy gains of WEAVER while reducing inference compute cost by 99.97% (right).

However, this is often a limited setup, as not all mathematical proofs can be processed by Lean. In contrast, more generally applicable verifiers such as LMs prompted as judges [13] and reward models [39, 45, 68] can be broadly applied to tasks like scientific reasoning, coding, and instruction-following [32, 40, 62]. However, these *weak verifiers* produce noisy, inconsistent scores, often exhibit poor calibration, and suffer from high false positive rates [73]. We ask: *to what extent can we leverage weak verifiers to improve accuracy in the repeated sampling regime?*

We explore *scaling verification*, specifically how to combine *multiple weak verifiers* to improve response selection for repeated sampling. As new pre-trained models become available, the pool of weak verifiers continues to expand and offer diverse, complementary sources of signal that could improve response selection if they can be aggregated effectively. Recent work has explored scaling verification through such as self-verification or averaging LM judge scores [9, 41, 93]. However, it remains unclear how to effectively combine multiple weak verifiers. We observe three key challenges towards ensembling weak verifiers:

1. **Naively aggregating weak verifiers is insufficient for reliable verification.** Weak verifiers such as LM-based judges or reward models produce noisy, biased, and poorly calibrated scores, leading to inconsistent performance. [13, 39, 73]. While using a naive unweighted average of verifier scores is straightforward, it implicitly assumes uniform verifier quality, causing low-quality verifiers to dominate and degrade the overall accuracy [21, 76, 88]. Moreover, while previous work has hypothesized that more sophisticated weighted ensembles should perform better, this claim has not been studied [41].
2. **Effective ensembling with limited labeled data is challenging.** More sophisticated ensembling techniques typically learn verifier weights from labeled data, but such data is expensive and difficult to obtain. *Weak Supervision* (WS), a family of statistical techniques developed for data labeling, offers a potential solution through algorithms that aggregate multiple weak signals—such as crowd-worker annotations and expert-defined heuristics—while only requiring a small amount of labeled data [23, 57, 58]. In traditional WS, practitioners can design and shape each weak signal to ensure sufficient quality (i.e., iteratively tweaking program-based heuristics), and guarantees of WS hinge on a baseline level of quality. Our weak signals, however, are fixed pre-trained language model verifiers, which have wildly varying accuracy—especially when applied to out-of-distribution tasks—and can emit incompatible outputs (logits, binary scores, Likert scores) [39] that we cannot easily tweak. Due to these conditions, WS algorithms may not perform well when directly applied to verification.
3. **Verification is expensive to deploy at inference.** Verification can dominate inference-time costs [45, 68], since each verifier must process both the problem and its candidate response(s) [42], often evaluating intermediate steps [42] and multiple solution paths [70]. In fact, achieving modest gains over unverified generation can require  $10\times$  to  $128\times$  the inference compute per query [9, 41, 69, 93].

In this work, we introduce WEAVER, a framework for aggregating weak verifiers without supervised finetuning on ground truth labels (Figure 1). First, we demonstrate that if we have access to a large

corpus of labeled training data (e.g., 50,000 query-response pairs), we can learn weighted ensembles that can outperform naive averaging by up to 11.2% points. This is because of wide variability in verifier accuracy. However, in many real-world scenarios, we do not have access to such quantities of labeled data. Second, to reduce the dependency on labeled data, we adapt Weak Supervision to the verification setting by addressing challenges around inconsistent outputs and low-accuracy verifiers. WEAVER filters out uninformative verifiers, normalizes verifier scores, and builds a latent variable model over these scores and the unknown true labels to estimate the verifier accuracies to be used as weights [26, 58].

Empirically, WEAVER improves over unweighted averaging of verifier scores by 17.1% and repeated sampling with majority voting by 13.5% (Table 1). WEAVER allows us to improve over  $Pass@1$  by 17.9% for 8B models and 14.5% for 70B models across reasoning and mathematics tasks (Tables 1 and 18). *This mirrors the performance jump from GPT-4o to o3-mini (73.9% vs. 88.2%)*—but without parameter tuning or post-training steps. We also study how WEAVER scales along different axes of test-time compute: generation, verifiers, model size, and inference budget (Section 5.2). We find that even as we increase the number of generations, many standard verification baselines (e.g. majority voting) quickly plateau (Figure 3). Naive ensembling saturates more slowly, but its gains are limited by high compute costs, and sensitivity to the choice and number of verifiers. We show that WEAVER outperforms alternative verification approaches by 13.5% while improving over  $Pass@1$  by 18.3% as we scale from  $2^1$  to  $2^{10}$  generations (Figure 3).

Finally, as an extension of WEAVER, we train a 400M parameter cross-encoder verifier using WEAVER’s selected responses to mitigate the compute costs of calling multiple weak verifiers on each response. We demonstrate that using distilled WEAVER cross-encoder as a verifier *retains 98.7% of the accuracy gains* from the learned verifier ensemble while reducing compute costs by three orders of magnitude – *saving 99.97% inference FLOPS* while still capturing an effective verification strategy (Section 6). Overall, our findings highlight that more reliable, scalable verification is possible even in the absence of ground-truth labels—paving the way for improved data filtering, model alignment, and inference-time decision-making.

## 2 Related Work

**LM Judges and Reward Models:** Both LM judges and reward models are promising approaches for evaluating language model outputs, but their high false positive rates limit their reliability [73]. LM judges can evaluate outputs without additional training [24, 47, 80], using approaches from simple prompting to chain-of-thought reasoning [47] and specialized fine-tuning [64, 75]. However, they face poor generalization across contexts [22, 59, 64] and systematic biases in position and self-preference [8, 37, 54, 96]. Similarly, while reward models have become central to model alignment [4, 14, 43], they struggle with noisy training signals from low inter-annotator agreement [3, 19, 53, 78] and learned biases favoring attributes like response length [18, 38, 67]. Recent work has improved individual verifier reliability through better data collection and chain-of-thought reasoning [83, 92], yet fundamental challenges persist [7, 20]. WEAVER advances beyond these approaches by combining multiple verification signals with adaptive weighting, thus leveraging the complementary strengths of weak verifiers while suppressing noise and reducing false positives.

**Weak Supervision:** WEAVER builds upon statistical techniques from weak supervision, which emerged as a framework for programmatically generating training labels by aggregating multiple weak sources [56, 58]. While initial work focused on classification tasks [23, 57], recent advances have expanded to handle multi-task settings [66] and structured prediction [77]. WEAVER applies this framework to answer verification, treating binary imperfect verification signals (e.g. reward models and LM judges) as weak supervision voters that classify candidate solutions as correct or incorrect. This novel application combines predictions by converting these diverse signals into binary verdicts, enabling WEAVER to learn better verification strategies from weak but complementary verifiers.

**Verification as another compute axis and aggregation:** Recent work has explored verification as a new scaling axis [9, 41, 46, 69, 73, 93]. However this work limits their analysis to one verifier, and instead scale how many times to verify [93]. Approaches that do leverage multiple verifiers often rely on substantial amounts of labeled data for aggregation or creating specialized verifiers [36, 41]. With WEAVER, we show that it is possible to combine verifiers without ground truth labels, even when they are not specialized. Other work has focused on combining multiple verifiers for post-training the base model using RLHF [21, 81, 84]. We note that this is a direction of future work (Section 7).

### 3 Preliminaries

First, we define the problem of how to select among repeated samples. We then define verifiers and key evaluation metrics, including the generation-verification gap.

**Problem Definition** Let  $q \in \mathcal{Q}$  be a input text query, and let  $r \in \mathcal{R} \sim \mathcal{M}(q)$  be a corresponding response sampled from language model  $\mathcal{M}$  with non-zero temperature. For a given query-response pair  $(q, r)$ , we define  $y: \mathcal{Q} \times \mathcal{R} \rightarrow \{0, 1\}$  such that  $y(q, r)$  is the correctness label of  $r$  for  $q$ . We are given an unlabeled test dataset  $\mathcal{D}^{\text{test}} = \{(q_i, \mathbf{r}_i)\}_{i=1}^n$ , where  $\mathbf{r}_i = \{r_{ij}\}_{j=1}^K$  consists of  $K$  repeatedly sampled responses from  $\mathcal{M}$  for each  $q_i$ . We do not have access to true labels  $y_{ij} := y(q_i, r_{ij})$  for any  $i, j$ .

For each  $(q_i, \mathbf{r}_i) \in \mathcal{D}^{\text{test}}$ , our goal is to select a correct response  $j^* \in [K]$  that satisfies  $y_{ij^*} = 1$ . We can broadly describe this selection rule using a scoring function  $f: \mathcal{Q} \times \mathcal{R} \rightarrow \mathbb{R}$ , namely  $j^* := \text{argmax}_j f^*(q_i, r_{ij})$ .

**Using verifiers** A verifier, either a reward model or an LLM prompted as a judge, can be expressed as a scoring function on query-response pairs  $v: \mathcal{Q} \times \mathcal{R} \rightarrow \mathbb{R}$ . For reward models, the verifier score is continuous, while for LLM judges, the verifier score is typically discrete (for our setup, we use  $[0, 1]$  and  $\{0, 1\}$ , respectively). We assume that we have access to multiple verifiers  $\mathcal{V} = v_1, \dots, v_m$ . We apply each of the  $m$  verifiers to each  $(q_i, r_{ij})$ , for a total of  $nmK$  scores on  $\mathcal{D}^{\text{test}}$  with  $s_{ijk} := v_k(q_i, r_{ij})$ . We aim to use  $\mathcal{V}$  to construct a good verification strategy  $f$ .

**Evaluation metrics** The Pass@K metric is the probability that there exists a correct response among  $K$  generated responses:  $\text{Pass@K} = \frac{1}{n} \sum_{i=1}^n \mathbf{1}(\exists j \in [K]: y_{ij} = 1)$ . This metric is independent of the verification strategy, and depends on the choice of  $\mathcal{M}$ ,  $K$ , and the task dataset. The success rate of a verification strategy  $\hat{f}$  is  $\frac{1}{n} \sum_{i=1}^n y_{i\hat{j}}$ , where  $\hat{j} = \text{argmax}_{j \in [K]} \hat{f}(q_i, r_{ij})$ . Success rate is dependent on the verification strategy and bounded by Pass@K, and equality is obtained with oracle verification (i.e.,  $\hat{f} = f^*$  can always select a correct  $j$  as long as it exists).

We define the *generation-verification gap* as  $\text{Pass@K} - \text{Success Rate}$ . A large positive gap indicates that although correct answers are generated, the verification strategy fails to select them consistently. We aim to close this gap and will use it to evaluate verification strategies.

### 4 WEAVER: A Framework for Weak Verifier Aggregation

In Section 4.1, we demonstrate that naively averaging multiple verifier scores to select responses significantly underperforms weighted ensembles; however, common methods for computing weights require labeled data [65, 89]. We introduce WEAVER (Section 4.2), a method for weighted aggregation of verifier scores with minimal data that draws inspiration from Weak Supervision.

#### 4.1 How to aggregate multiple verifiers: weighted vs unweighted ensembles

A straightforward approach for using multiple verifiers is a naive ensemble—selecting the response with the highest average verifier score:  $f(q_i, r_{ij}) = \frac{1}{m} \sum_{k=1}^m s_{ijk}$ . This approach [41] does not consider the relative accuracy of verifiers. However, we observed that there is significant variation in the success rates of individual verifiers—spanning a range of up to 37.5%—suggesting that naive ensembles could be suboptimal (Table 14).

An alternative is to use a weighted ensemble. One approach is to use a labeled dataset to identify and use the top-performing verifier, effectively assigning a weight of 0 to discarded verifiers. Other strategies include using Logistic Regression or a Naive Bayes classifier, where the scoring function  $f(q_i, r_{ij})$  is the probability  $\Pr(y_{ij} = 1 | s_{ij1}, \dots, s_{ijm})$ , which are fit using labeled data and can be either modeled as a logistic function or factorized using Bayes’ rule and independence assumptions, respectively.

In Figure 2, we compare a naive ensemble with weighted ensembles for several tasks, using Llama 3.3 70B Instruct to generate responses and using a collection of 33 7B-72B reward models and LM judges as verifiers. We see that using a weighted ensemble can achieve up to 11.2 points higher success rate than the naive ensemble. However, all weighted ensembles shown are “oracle” methods: they are computed using  $y_{ij}$  for all  $i \in [n], j \in [K]$ , although in practice these labels are unknown for  $\mathcal{D}^{\text{test}}$ . In fact, when we instead use  $0.01n$  labeled samples, accuracy drops by 20.1% on average (Table 15). This raises the question of how to best construct weighted ensembles with limited labeled data.

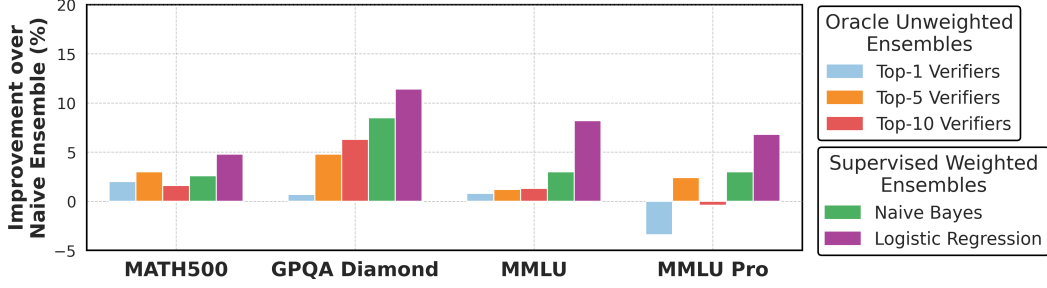

Figure 2: **Weighted Verifier Ensembles Outperform Naive Verifier Ensemble:** By using oracle data to keep the best verifiers (i.e. *top-K verifier ensembles*) or learn aggregation weights for verifiers (i.e. *supervised weighted ensembles*), we can improve beyond naive combinations of the verifiers available by 3.6% and 7.8%, on average, respectively.

## 178 4.2 WEAVER: weighted ensembling of verifier scores with minimal labeled data

179 We first describe the WS method we use in WEAVER to construct a weighted ensemble over binary  
 180 verifier scores. Because verifiers often produce scores in inconsistent formats and exhibit low  
 181 accuracies—challenges not typically encountered in traditional WS—we introduce a binarization  
 182 and verifier discarding strategy in Appendix B.2 to discard low-quality verifiers and ensure that only  
 183 sufficiently reliable binary scores are used as input to the WS method.

### 184 4.2.1 Weak Supervision Algorithm

185 In Weak Supervision, the input is an unlabeled dataset, where each entry has multiple binary “votes”  
 186 on the true label. Applied to our setting, each entry is a query-response pair, forming a dataset of size  
 187  $nK$ , and verifier scores  $s_{ijk}$  are binarized into votes  $\bar{s}_{ijk} \in \{0,1\}$  for all  $i,j,k$ . Our goal is to predict  
 188 the probability that a response is correct  $\Pr(y_{ij} = 1 | s_{ij1}, \dots, s_{ijm})$  for all  $i,j$ .

189 **WS model** We can view all  $y_{ij}$  as samples of an unknown random variable  $Y$  and each  $\bar{s}_{ijk}$  across  
 190  $i,j$  as samples of a random variable  $S_k$ . WS then defines a latent variable graphical model over the  
 191 random binary vector  $\{Y, S_1, \dots, S_m\}$ , where  $Y$  is latent while  $S_1, \dots, S_m$  are observable. While existing  
 192 WS methods assume various models, one common assumption is that  $S_i \perp S_j | Y$  for each  $S_i, S_j$ . That  
 193 is,  $S_i$  and  $S_j$  are conditionally independent given  $Y$ ; intuitively, each verifier captures independent  
 194 aspects of the correctness of the response. Under this assumption, we can write the posterior as the  
 195 following, for some given binary verifier scores  $\{\bar{s}_1, \dots, \bar{s}_m\}$ :

$$\Pr(Y = 1 | S_1 = \bar{s}_1, \dots, S_m = \bar{s}_m) = \frac{\prod_{i=1}^m \Pr(S_i = \bar{s}_i | Y = 1) \Pr(Y = 1)}{\Pr(S_1 = \bar{s}_1, \dots, S_m = \bar{s}_m)} \quad (1)$$

196 The weighted ensemble score for each query-response pair can be written in terms of: 1)  
 197  $\Pr(S_1 = \bar{s}_1, \dots, S_m = \bar{s}_m)$ , which can be computed from the data; 2)  $\Pr(Y = 1)$ , which can be estimated  
 198 from  $\mathcal{D}^{\text{dev}}$ ; and 3)  $\Pr(S_i = \bar{s}_i | Y = 1)$ , or equivalently  $\Pr(S_i = 1 | Y = 1)$ , which is the verifier’s  
 199 “accuracy parameter”—this cannot be computed directly since we do not have access to  $Y$ . Next, we  
 200 discuss how to estimate accuracy parameters,  $\Pr(S_i = 1 | Y = 1)$ , without labels.

201 **WS parameter estimation** We outline a parameter estimation technique first introduced in [56].  
 202 Due to the assumption that  $S_i \perp S_j | Y$ , the following equation holds:

$$\begin{aligned} \Pr(S_i, S_j) &= \Pr(S_i, S_j | Y = 1) \Pr(Y = 1) + \Pr(S_i, S_j | Y = 0) \Pr(Y = 0) \\ &= \Pr(S_i | Y = 1) \Pr(S_j | Y = 1) \Pr(Y = 1) + \Pr(S_i | Y = 0) \Pr(S_j | Y = 0) \Pr(Y = 0) \end{aligned} \quad (2)$$

203 Note that  $\Pr(S_i, S_j)$  can be computed from the known verifier scores, and  $\Pr(Y = 1)$  is estimated  
 204 from  $\mathcal{D}^{\text{dev}}$ . Then, equation 2 is a quadratic equation over the accuracy parameters. We can write this  
 205 equation for every pair  $S_i, S_j$ , and for every pair of values  $\{0,1\}^2$  they can take. Furthermore, we can  
 206 write another type of equation over the accuracy parameters:

$$\Pr(S_i = 1) = \Pr(S_i = 1 | Y = 1) \Pr(Y = 1) + \Pr(S_i = 1 | Y = 0) \Pr(Y = 0) \quad (3)$$



207 This is a consistency property that holds regardless of the conditional independence assumption, and  
 208 we can write this equation for each of the  $m$   $S_i$ 's. Because we know that the accuracy parameters  
 209 should follow equations 2 and 3, we can construct an objective function that aims to minimize the  
 210 difference between the left and right hand sides of these equations. We write this efficiently in  
 211 matrix notation. Let  $P \in \mathbb{R}^{2 \times 2}$  be a diagonal matrix with diagonal  $[\Pr(Y=0) \Pr(Y=1)]$ . Define  
 212  $\mu \in \mathbb{R}^{m \times 2}$  to be the matrix of accuracy parameters, and define  $O \in \mathbb{R}^{2m \times 2m}$  to be a matrix over the  
 213 joint probabilities of pairs of  $S_i, S_j$ ; more formally:

$$\begin{aligned} \mu_{2i-1:2i, 1:2} &= \begin{bmatrix} \Pr(S_i=0|Y=0) & \Pr(S_i=0|Y=1) \\ \Pr(S_i=1|Y=0) & \Pr(S_i=1|Y=1) \end{bmatrix}, O_{2i-1:2i, 2i-1:2i} = \begin{bmatrix} \Pr(S_i=0) & 0 \\ 0 & \Pr(S_i=1) \end{bmatrix} \forall i \in [m] \\ O_{2i-1:2i, 2j-1:2j} &= \begin{bmatrix} \Pr(S_i=0, S_j=0) & \Pr(S_i=0, S_j=1) \\ \Pr(S_i=1, S_j=0) & \Pr(S_i=1, S_j=1) \end{bmatrix} \forall i \neq j \in [m] \end{aligned} \quad (4)$$

214 Let off-diag denote the elements of a matrix that lie outside its  $2 \times 2$  block diagonal. Then, to estimate  
 215  $\mu$  that satisfies both equations 2 and 3, we have the following objective:

$$\text{minimize}_{\mu} \|O_{\text{off-diag}} - (\mu P \mu^T)_{\text{off-diag}}\|^2 + \|\text{diag}(O) - \mu P \mathbf{1}^T\|^2 \quad (5)$$

216 We optimize 5 using gradient descent to estimate the verifier accuracy parameters. These estimates  
 217 are then used in Eq. (1) to select the response with the highest estimated posterior. We provide a full  
 218 derivation in Appx. B.1.

## 219 5 Results

220 In section 5.1, we provide empirical results on WEAVER's performance compared to other approaches  
 221 for selecting responses in repeated sampling. In section 5.2, we study how WEAVER's performance  
 222 scales along several axes: the number of responses, model size, verifier counts, and inference compute.

223 **Datasets, Verifiers, and Baselines** Our reward models range in size from 8B to 72B, are all open-  
 224 source, and are obtained from RewardBench [39], a popular evaluation tool for reward models. We  
 225 prompt open-source language models from Chatbot Arena [13] to serve as judges. Unless specified, we  
 226 use Llama 3.3 70B Instruct to generate responses and use all 33 reward models and judges. We evaluate  
 227 on MATH-500, GPQA Diamond, MMLU College, and MMLU Pro. See Appx. C.1 for more details.

228 We compare WEAVER against verifier-free baselines as well as standard verification strategies. First  
 229 Sample, also known as Pass@1, only uses the first response and does not scale test-time compute  
 230 or verification. Majority Voting involves repeated sampling but not verification, picking the most  
 231 common final answer from the responses [5, 10, 70]. We compare against the highest scoring reward  
 232 model and a naive ensemble of the top-10 reward models on RewardBench. We also evaluate two  
 233 recently proposed methods that scale verification but do not use multiple verifier models or weighted  
 234 ensembles: Self-Verification [93] and Multi-Agent Verification [41]. Lastly, we report the oracle  
 235 Pass@K rate, which establishes an upper bound for the success rate of these verification strategies.

### 236 5.1 WEAVER Shrinks the Gap with Frontier LMs

237 In Table 1, we evaluate WEAVER along with baseline verification methods, the first sample performance  
 238 of frontier LMs, and the Pass@100 metric. We use LLaMA 3.3 70B Instruct to generate  $K = 100$   
 239 responses per query. We find that WEAVER's weighted ensembling of multiple verifiers allows us to  
 240 outperform majority vote by 14% and come within 5.7% of the Pass@100 oracle metric. Furthermore,  
 241 WEAVER rivals the performance of frontier reasoning models—coming within 0.5% of OpenAI's  
 242 o3-mini [52]—even though we use a non-reasoning model for generation.

### 243 5.2 WEAVER Improves Compute-Accuracy Trade-Off for Scaling

244 By proposing to combine multiple weak verifiers instead of one, we introduce yet another axis for  
 245 test-time scaling. In this section, we study how well scaling verification with WEAVER interacts with  
 246 common previously studied axes for verification, summarized in Table 2.

247 **(1) Scaling Candidate Generations:** we study the performance of verification methods as we increase  
 248 the number of repeated samples in Fig. 3. Based on prior work [4, 12], as the number of responses  
 249 increases, we are more likely to see a correct response (i.e. Pass@K increases), and hence more likely

Table 1: **WEAVER Outperforms Baseline Verification Methods and Shrinks Gap with Frontier LMs.**

|                     | Methodology                                      | Generations ( $K$ ) | Datasets |              |              |          | Average |
|---------------------|--------------------------------------------------|---------------------|----------|--------------|--------------|----------|---------|
|                     |                                                  |                     | MATH 500 | GPQA Diamond | MMLU College | MMLU Pro |         |
| Baselines           | First Sample                                     | 1                   | 78.0%    | 42.9%        | 82.6%        | 69.9%    | 68.4%   |
|                     | Majority Voting                                  | 100                 | 83.0%    | 47.4%        | 84.1%        | 74.4%    | 72.2%   |
|                     | Highest Scoring RM on RewardBench [39, 49]       | 100                 | 78.2%    | 49.7%        | 86.0%        | 77.0%    | 72.7%   |
|                     | Naive Ensemble of Top-10 RMs on RewardBench [39] | 100                 | 75.4%    | 41.3%        | 88.1%        | 71.4%    | 69.1%   |
|                     | Self-Verification [93]                           | 100                 | 78.1%    | 43.1%        | 82.0%        | 69.5%    | 66.9%   |
|                     | Multi-Agent Verification [41]                    | 100                 | 81.3%    | 47.8%        | 84.1%        | 72.6%    | 71.6%   |
|                     | WEAVER                                           | 100                 | 93.4%    | 66.4%        | 94.9%        | 90.2%    | 86.2%   |
| Frontier Approaches | GPT-4o [51]                                      | 1                   | 77.4%    | 35.9%        | 87.1%        | 75.4%    | 69.0%   |
|                     | Claude 3.7 Sonnet [2]                            | 1                   | 69.2%    | 48.0%        | 86.1%        | 78.1%    | 70.4%   |
|                     | Llama 4 Maverick [48]                            | 1                   | 87.6%    | 68.9%        | 91.1%        | 81.0%    | 82.2%   |
|                     | o3-mini [52]                                     | 1                   | 94.4%    | 74.0%        | 92.2%        | 86.0%    | 86.7%   |
|                     | Oracle Verification (Pass@100)                   | 100                 | 98.6%    | 81.0%        | 96.0%        | 92.0%    | 91.9%   |
|                     |                                                  |                     |          |              |              |          |         |

Table 2: **Scaling Dimensions for Generation and Verification Models**

| Scaling Dimension                                  | Base Model                 | Verifier Type                               | Visuals  |
|----------------------------------------------------|----------------------------|---------------------------------------------|----------|
| <b>Sample Count:</b> More Generations              | Temperature-based sampling | Majority Vote, Weak Verifier, Top-K, WEAVER | Figure 3 |
| <b>Model Size:</b> Larger Models                   | Llama 8B $\rightarrow$ 70B | RM-8B $\rightarrow$ RM-70B                  | Table 3  |
| <b>Verifier Count:</b> More Models                 | Llama 8B/70B               | RMs and LM Judges                           | Figure 4 |
| <b>Inference Compute:</b> More FLOPs for Gen./Ver. | Temp-based sampling        | Weak Verifiers + WEAVER                     | Figure 5 |

250 to select a correct response given a good verification strategy. However, differences in verification  
251 translate into different scaling rates. We evaluate the performance of WEAVER and baselines for  
252  $K = 2^0$  to  $2^{10}$ , comparing to o3-mini and Pass@K as well. Across all tasks, WEAVER yields the  
253 most substantial gains when scaling the number of generations. WEAVER consistently narrows the  
254 generation-verification gap with the oracle upper bound (Pass@K) while alternative verification  
255 strategies plateau after a few generations. The effect is particularly pronounced on difficult tasks like  
256 GPQA. We detail the scaling trends observed in Fig. 3 in Appx. C.3.

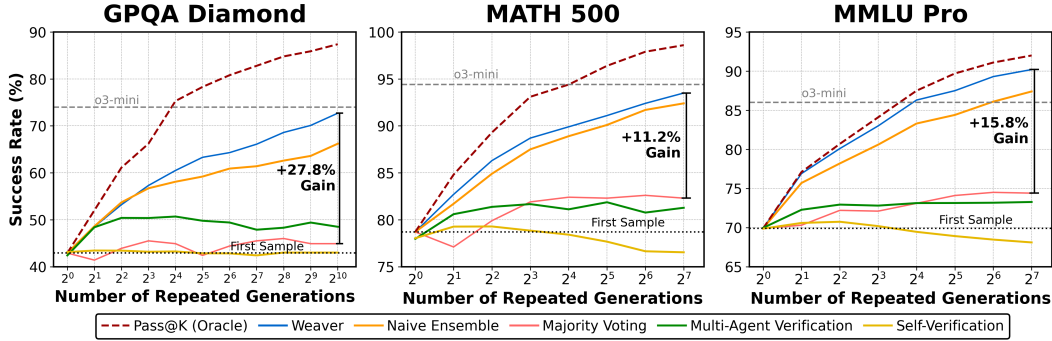

Figure 3: **Scaling Generations Boosts Performance with WEAVER:** The generation-verification gap shrinks when increasing  $K$  and leveraging WEAVER, outperforming alternative verification methods by an average 18.3%.

257 **(2) Scaling Model Sizes:** In Table 3, we study how WEAVER applied on smaller models (both  
258 verifiers and for generating responses) can allow us to match the performance of larger models,  
259 enabling weak-to-strong verification. We consider an 8B setting—using LLaMA 3.1 8B to generate  
260 responses along with 8B verifiers—and compare this to a 70B setting (LLaMA 3.3 70B Instruct,  
261 8B-72B verifiers) as well as o3-mini. We see that WEAVER applied at the 8B scale comes within 2.2%

of the majority vote baseline at the 70B scale, and WEAVER at 70B comes within 0.5% of o3-mini, demonstrating a weak-to-strong verification phenomenon.

Table 3: WEAVER Reduces Gap between Model Classes: 8B and 70B, 70B and Frontier LM

| Generator Model        | Verifier Model       | Aggregation Strategy | Datasets |              |              |          | Average      |
|------------------------|----------------------|----------------------|----------|--------------|--------------|----------|--------------|
|                        |                      |                      | MATH     | GPQA Diamond | MMLU College | MMLU Pro |              |
| Llama 3.1 8B Instruct  | N/A<br>8B and below  | Majority Vote        | 69.0%    | 30.5%        | 72.7%        | 56.4%    | 57.2%        |
|                        |                      | WEAVER               | 80.0%    | 47.1%        | 85.7%        | 67.2%    | <b>70.0%</b> |
|                        |                      | $\Delta$ w. WEAVER   | +11.0%   | +16.6%       | +13.0%       | +10.2%   | +12.8%       |
| Llama 3.3 70B Instruct | N/A<br>72B and below | Majority Vote        | 83.0%    | 47.4%        | 84.1%        | 74.4%    | 72.2%        |
|                        |                      | WEAVER               | 93.4%    | 66.4%        | 94.9%        | 90.2%    | <b>86.2%</b> |
|                        |                      | $\Delta$ w. WEAVER   | +10.4%   | +9.0%        | +10.8%       | +15.8%   | +14.0%       |
| o3-mini                | N/A                  | First Sample         | 94.4%    | 74.0%        | 92.2%        | 86.0%    | <b>86.7%</b> |

(3) **Scaling Verifier Count:** Two axes for scaling verification are (1) the number of verifiers used or (2) the number of scores sampled from each verifier. Fig. 4 shows how the performance changes as we ensemble more verifiers (up to 15) using naive ensembling and WEAVER. We can see that aggregating verifiers continuously improves performance over using the top-1 verifier by up to 8.5%. However, these gains diminish as we continue to add models to the ensemble. These results reflect the classic ensemble bias-variance tradeoff: initial gains arise from variance reduction as independent verifier errors are averaged out, but performance plateaus as additional verifiers contribute redundant information due to correlated biases on systematically difficult examples. [1]. We also include results on scaling the number of scores per verifier in Appendix C.5. We find that scaling the number of verifiers yields better performance than sampling multiple scores from the same verifier (i.e., via prompt tuning or temperature variation). However, this method is complementary and could be used in conjunction with scaling the verifier count.

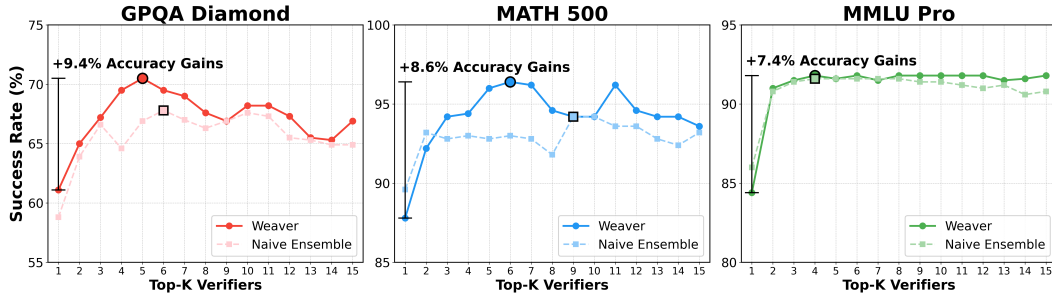

Figure 4: WEAVER Benefits from Adding Top-K Verifiers.

(4) **Scaling Test-Time Compute:** We study how performance scales in the total compute used for both verification and repeated generations. Figure 5 shows the relationship between inference-time compute and success rate for different generation-verification systems. For each method, we scale the number of generations exponentially from 1 to 100 and plot the required inference compute for generation and verification together versus the success rate. Note that Fig. 5 differs from Fig. 3, since Majority Voting requires 0 verification inference calls while WEAVER requires 30+ calls for the weak verifiers. We find that WEAVER achieves the highest maximum success rate; notably, majority voting plateaus at around  $2^2$  to  $2^3$  ExaFLOPs per query while WEAVER continues scaling until 512 ExaFLOPs. However, the additional compute required for WEAVER can be prohibitive. We explore how to reduce this computational burden while retaining WEAVER’s performance in the next section.

## 6 WEAVER Distillation: Improving Verification Efficiency at Inference

We explore distillation strategies for fine-tuning a smaller LM as a task-specific verifier. In particular, we train *cross-encoders*; the input is a concatenated query-response pair, while the output is WEAVER’s



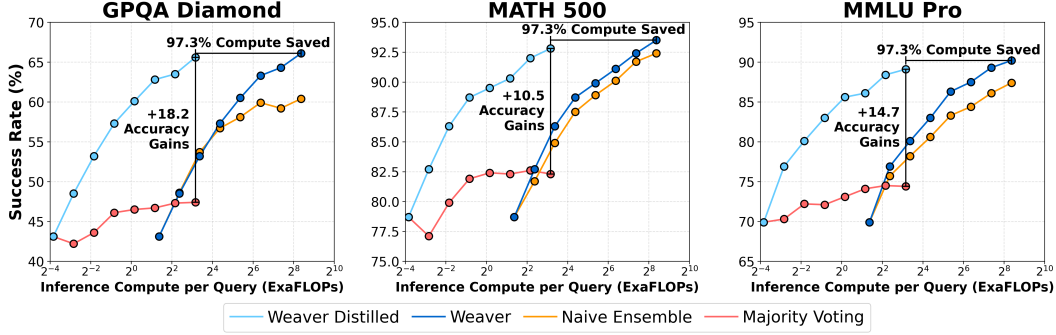

Figure 5: **WEAVER Improves the Accuracy-Compute Performance Trade-Offs.**

289 pseudolabel generated from Weak Supervision, namely  $\Pr(y_{ij} = 1 | s_{ij1}, \dots, s_{ijm})$  (see Section 4). Cross-  
 290 encoders are used for a variety of NLP tasks requiring comparison between two textual inputs, including  
 291 search result reranking [50], question-answer matching [25], semantic textual similarity assessment  
 292 [60], natural language inference [16], and response quality evaluation in dialogue systems [31]. For  
 293 the model, we selected ModernBERT-Large (396M) [85]. For more details, please see Appendix C.6.

294 Figure 6, shows the performance of WEAVER  
 295 on the Llama-70B generations against the cross-  
 296 encoder on GPQA Diamond. Across tasks, we  
 297 find that the distilled cross-encoder is able to capture  
 298 98.2% of the performance of WEAVER. Fur-  
 299 thermore, while it would cost 35.35 exaFLOPs to  
 300 run all the verifiers needed for preparing and eval-  
 301 uating WEAVER, while running a 400M cross-  
 302 encoder costs 1.01 exaFLOPs for evaluating 100  
 303 samples, *this is more than three orders of magni-  
 304 tude in compute cost reduction, saving 99.97%  
 305 of the FLOPs originally required for running  
 306 the 70B verifiers.* We also outperform majority  
 307 voting by 23.2% while only incurring a 0.57%  
 308 increased inference cost over only generating the  
 309 responses. We see similar results for additional  
 310 datasets in Figure 14 (Appx. C.6).

311 These results suggest that, through distillation,  
 312 we can capture the combined strengths of the  
 313 weak verifiers used for WEAVER, and deploy gen-  
 314 eralizable and lightweight cross-encoders that  
 315 use only a fraction of the parameters used for gen-  
 316 eration. This reduces our hardware constraints  
 317 considerably; *rather than utilizing an 8-GPU node per 70B verifier (i.e. Nvidia H200s with 80B  
 318 memory), we only require a single A100 GPU with 32GB of memory for our cross-encoder.* Our  
 319 economical approach has the added benefit of leaving the original generation model *frozen* (i.e. without  
 320 any parameter tuning), allowing us to preserve the original model’s distribution at inference [87, 91].

## 321 7 Conclusion

322 WEAVER offers a flexible and scalable framework for aggregating weak verifiers, achieving strong  
 323 performance across diverse reasoning tasks while remaining computationally efficient. Our results  
 324 show that combining many weak verifier can further close the generation verification gap with a fraction  
 325 of the compute. Looking forward, several directions stand to extend WEAVER’s impact. First, designing  
 326 specialized verifiers can further enhance task-specific accuracy. Second, WEAVER can be leveraged for  
 327 RLHF for better supervision signals. Multimodal extensions of WEAVER represent another exciting  
 328 frontier. Finally, the compute efficiency of WEAVER opens the door to improved on-device verification.

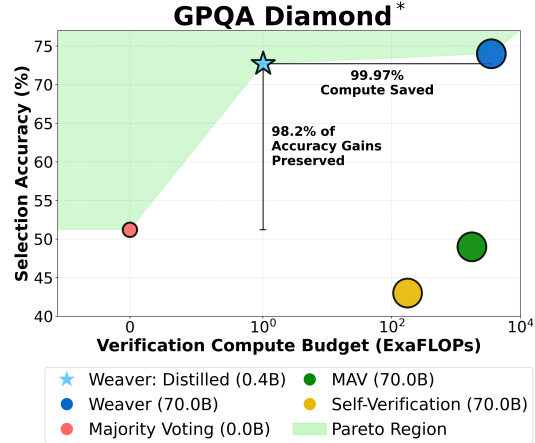

Figure 6: **Distilling WEAVER into a 400M Cross-Encoder Almost Entirely Captures the Performance of WEAVER, Yielding 99.97% Compute Savings.** \*We train/evaluate on an 80:20 split.

## References

- [1] Taiga Abe, E. Kelly Buchanan, Geoff Pleiss, and John Patrick Cunningham. Pathologies of predictive diversity in deep ensembles. Transactions on Machine Learning Research, 2024. Featured Certification.
- [2] Anthropic. Claude 3.7 sonnet and claude code, February 2025. Announcement blog post, 5 min read.
- [3] Amanda Askell, Yuntao Bai, Anna Chen, Dawn Drain, Deep Ganguli, Tom Henighan, Andy Jones, Nicholas Joseph, Ben Mann, Nova DasSarma, et al. A General Language Assistant as a Laboratory for Alignment. ArXiv Preprint arXiv:2112.00861, 2021.
- [4] Ralph Allan Bradley and Milton E Terry. Rank Analysis of Incomplete Block Designs: I. The Method of Paired Comparisons. Biometrika, 39(3/4):324–345, 1952.
- [5] Bradley Brown, Jordan Juravsky, Ryan Ehrlich, Ronald Clark, Quoc V. Le, Christopher Ré, and Azalia Mirhoseini. Large language monkeys: Scaling inference compute with repeated sampling, 2024.
- [6] Zhe Cao, Tao Qin, Tie-Yan Liu, Ming-Feng Tsai, and Hang Li. Learning to rank: from pairwise approach to listwise approach. In Proceedings of the 24th international conference on Machine learning, pages 129–136, 2007.
- [7] Shreyas Chaudhari, Pranjal Aggarwal, Vishvak Murahari, Tanmay Rajpurohit, Ashwin Kalyan, Karthik Narasimhan, Ameet Deshpande, and Bruno Castro da Silva. RLHF Deciphered: A Critical Analysis of Reinforcement Learning from Human Feedback for LLMs, 2024.
- [8] Guiming Hardy Chen, Shunian Chen, Ziche Liu, Feng Jiang, and Benyou Wang. Humans or LLMs as the Judge? A Study on Judgement Bias. ArXiv Preprint arXiv:2402.10669, 2024.
- [9] Jiefeng Chen, Jie Ren, Xinyun Chen, Chengrun Yang, Ruoxi Sun, and Sercan Ö Arık. Sets: Leveraging self-verification and self-correction for improved test-time scaling. arXiv preprint arXiv:2501.19306, 2025.
- [10] Lingjiao Chen, Jared Quincy Davis, Boris Hanin, Peter Bailis, Ion Stoica, Matei Zaharia, and James Zou. Are more llm calls all you need? towards scaling laws of compound inference systems. arXiv preprint arXiv:2403.02419, 2024.
- [11] Lingjiao Chen, Jared Quincy Davis, Boris Hanin, Peter Bailis, Ion Stoica, Matei Zaharia, and James Zou. Are more llm calls all you need? towards scaling laws of compound inference systems, 2024.
- [12] Mark Chen, Jerry Tworek, Heewoo Jun, Qiming Yuan, Henrique Ponde de Oliveira Pinto, Jared Kaplan, Harri Edwards, Yuri Burda, Nicholas Joseph, Greg Brockman, Alex Ray, Raul Puri, Gretchen Krueger, Michael Petrov, Heidy Khlaaf, Girish Sastry, Pamela Mishkin, Brooke Chan, Scott Gray, Nick Ryder, Mikhail Pavlov, Alethea Power, Lukasz Kaiser, Mohammad Bavarian, Clemens Winter, Philippe Tillet, Felipe Petroski Such, Dave Cummings, Matthias Plappert, Fotios Chantzis, Elizabeth Barnes, Ariel Herbert-Voss, William Hebgen Guss, Alex Nichol, Alex Paino, Nikolas Tezak, Jie Tang, Igor Babuschkin, Suchir Balaji, Shantanu Jain, William Saunders, Christopher Hesse, Andrew N. Carr, Jan Leike, Josh Achiam, Vedant Misra, Evan Morikawa, Alec Radford, Matthew Knight, Miles Brundage, Mira Murati, Katie Mayer, Peter Welinder, Bob McGrew, Dario Amodei, Sam McCandlish, Ilya Sutskever, and Wojciech Zaremba. Evaluating large language models trained on code, 2021.
- [13] Wei-Lin Chiang, Lianmin Zheng, Ying Sheng, Anastasios Nikolas Angelopoulos, Tianle Li, Dacheng Li, Hao Zhang, Banghua Zhu, Michael Jordan, Joseph E. Gonzalez, and Ion Stoica. Chatbot arena: An open platform for evaluating llms by human preference, 2024.
- [14] Paul F Christiano, Jan Leike, Tom Brown, Miljan Martic, Shane Legg, and Dario Amodei. Deep Reinforcement Learning from Human Preferences. Advances in Neural Information Processing Systems, 30, 2017.

- [15] Ganqu Cui, Lifan Yuan, Zefan Wang, Hanbin Wang, Wendi Li, Bingxiang He, Yuchen Fan, Tianyu Yu, Qixin Xu, Weize Chen, et al. Process reinforcement through implicit rewards. arXiv preprint arXiv:2502.01456, 2025.
- [16] Jacob Devlin, Ming-Wei Chang, Kenton Lee, and Kristina Toutanova. Bert: Pre-training of deep bidirectional transformers for language understanding, 2019.
- [17] Nicolai Dorka. Quantile regression for distributional reward models in rlhf. arXiv preprint arXiv:2409.10164, 2024.
- [18] Yann Dubois, Balázs Galambosi, Percy Liang, and Tatsunori B Hashimoto. Length-Controlled AlpacaEval: A Simple Way to Debias Automatic Evaluators. ArXiv Preprint arXiv:2404.04475, 2024.
- [19] Yann Dubois, Chen Xuechen Li, Rohan Taori, Tianyi Zhang, Ishaan Gulrajani, Jimmy Ba, Carlos Guestrin, Percy S Liang, and Tatsunori B Hashimoto. AlpacaFarm: A Simulation Framework for Methods that Learn from Human Feedback. Advances in Neural Information Processing Systems, 36, 2024.
- [20] Jacob Eisenstein, Jonathan Berant, Chirag Nagpal, Alekh Agarwal, Ahmad Beirami, Alexander Nicholas D’Amour, Krishnamurthy Dj Dvijotham, Katherine A Heller, Stephen Robert Pfohl, and Deepak Ramachandran. Reward Model Underspecification in Language Model Alignment. In NeurIPS 2023 Workshop on Distribution Shifts: New Frontiers with Foundation Models, 2023.
- [21] Jacob Eisenstein, Chirag Nagpal, Alekh Agarwal, Ahmad Beirami, Alex D’Amour, DJ Dvijotham, Adam Fisch, Katherine Heller, Stephen Pfohl, Deepak Ramachandran, et al. Helping or herding? reward model ensembles mitigate but do not eliminate reward hacking. arXiv preprint arXiv:2312.09244, 2023.
- [22] Shahul Es, Jithin James, Luis Espinosa-Anke, and Steven Schockaert. RAGAs: Automated Evaluation of Retrieval Augmented Generation. ArXiv Preprint arXiv:2309.15217, 2023.
- [23] Daniel Fu, Mayee Chen, Frederic Sala, Sarah Hooper, Kayvon Fatahalian, and Christopher Ré. Fast and three-rious: Speeding up weak supervision with triplet methods. In International conference on machine learning, pages 3280–3291. PMLR, 2020.
- [24] Jinlan Fu, See-Kiong Ng, Zhengbao Jiang, and Pengfei Liu. GPTScore: Evaluate as You Desire. Proceedings of the 2024 Conference of the North American Chapter of the Association for Computational Linguistics: Human Language Technologies (Volume 1: Long Papers), 2023.
- [25] Siddhant Garg, Thuy Vu, and Alessandro Moschitti. Tanda: Transfer and adapt pre-trained transformer models for answer sentence selection, 2019.
- [26] Alastair R Hall. Generalized method of moments. A companion to theoretical econometrics, pages 230–255, 2003.
- [27] HazyResearch. metal. <https://github.com/HazyResearch/metal>, 2018.
- [28] Dan Hendrycks, Collin Burns, Saurav Kadavath, Akul Arora, Steven Basart, Eric Tang, Dawn Song, and Jacob Steinhardt. Measuring mathematical problem solving with the math dataset. arXiv preprint arXiv:2103.03874, 2021.
- [29] Jordan Hoffmann, Sebastian Borgeaud, Arthur Mensch, Elena Buchatskaya, Trevor Cai, Eliza Rutherford, Diego de Las Casas, Lisa Anne Hendricks, Johannes Welbl, Aidan Clark, et al. Training compute-optimal large language models. arXiv preprint arXiv:2203.15556, 2022.
- [30] Jordan Hoffmann, Sebastian Borgeaud, Arthur Mensch, Elena Buchatskaya, Trevor Cai, Eliza Rutherford, Diego de Las Casas, Lisa Anne Hendricks, Johannes Welbl, Aidan Clark, Tom Hennigan, Eric Noland, Katie Millican, George van den Driessche, Bogdan Damoc, Aurelia Guy, Simon Osindero, Karen Simonyan, Erich Elsen, Jack W. Rae, Oriol Vinyals, and Laurent Sifre. Training compute-optimal large language models, 2022.
- [31] Samuel Humeau, Kurt Shuster, Marie-Anne Lachaux, and Jason Weston. Poly-encoders: Transformer architectures and pre-training strategies for fast and accurate multi-sentence scoring, 2020.

- [32] Naman Jain, King Han, Alex Gu, Wen-Ding Li, Fanjia Yan, Tianjun Zhang, Sida Wang, Armando Solar-Lezama, Koushik Sen, and Ion Stoica. Livecodebench: Holistic and contamination free evaluation of large language models for code, 2024.
- [33] Jared Kaplan, Sam McCandlish, Tom Henighan, Tom B. Brown, Benjamin Chess, Rewon Child, Scott Gray, Alec Radford, Jeffrey Wu, and Dario Amodei. Scaling laws for neural language models, 2020.
- [34] Omar Khattab, Arnav Singhvi, Paridhi Maheshwari, Zhiyuan Zhang, Keshav Santhanam, Sri Vardhamanan, Saiful Haq, Ashutosh Sharma, Thomas T. Joshi, Hanna Moazam, Heather Miller, Matei Zaharia, and Christopher Potts. Dspy: Compiling declarative language model calls into self-improving pipelines. *arXiv preprint arXiv:2310.03714*, 2023.
- [35] Diederik P. Kingma and Jimmy Ba. Adam: A method for stochastic optimization, 2017.
- [36] Jan Hendrik Kirchner, Yining Chen, Harri Edwards, Jan Leike, Nat McAleese, and Yuri Burda. Prover-verifier games improve legibility of llm outputs. *arXiv preprint arXiv:2407.13692*, 2024.
- [37] Dahyun Koo, Yejin Choi, and Eunsol Choi. Cognitive Biases in Large Language Models as Evaluators. *ArXiv Preprint arXiv:2312.05441*, 2023.
- [38] Nathan Lambert and Roberto Calandra. The alignment ceiling: Objective mismatch in reinforcement learning from human feedback. *ArXiv Preprint arXiv:2311.00168*, 2023.
- [39] Nathan Lambert, Valentina Pyatkin, Jacob Morrison, LJ Miranda, Bill Yuchen Lin, Khyathi Chandu, Nouha Dziri, Sachin Kumar, Tom Zick, Yejin Choi, Noah A. Smith, and Hannaneh Hajishirzi. RewardBench: Evaluating Reward Models for Language Modeling, 2024.
- [40] Xuechen Li, Tianyi Zhang, Yann Dubois, Rohan Taori, Ishaan Gulrajani, Carlos Guestrin, Percy Liang, and Tatsunori B. Hashimoto. AlpacaEval: An automatic evaluator of instruction-following models. [https://github.com/tatsu-lab/alpaca\\_eval](https://github.com/tatsu-lab/alpaca_eval), 2023.
- [41] Shalev Lifshitz, Sheila A. McIlraith, and Yilun Du. Multi-agent verification: Scaling test-time compute with multiple verifiers, 2025.
- [42] Hunter Lightman, Vineet Kosaraju, Yura Burda, Harri Edwards, Bowen Baker, Teddy Lee, Jan Leike, John Schulman, Ilya Sutskever, and Karl Cobbe. Let’s verify step by step, 2023.
- [43] Chris Yuhao Liu and Liang Zeng. Skywork Reward Model Series. <https://huggingface.co/Skywork>, September 2024.
- [44] Chris Yuhao Liu, Liang Zeng, Jiakai Liu, Rui Yan, Jujie He, Chaojie Wang, Shuicheng Yan, Yang Liu, and Yahui Zhou. Skywork-reward: Bag of tricks for reward modeling in llms. *arXiv preprint arXiv:2410.18451*, 2024.
- [45] Runze Liu, Junqi Gao, Jian Zhao, Kaiyan Zhang, Xiu Li, Biqing Qi, Wanli Ouyang, and Bowen Zhou. Can 1b llm surpass 405b llm? rethinking compute-optimal test-time scaling, 2025.
- [46] Runze Liu, Junqi Gao, Jian Zhao, Kaiyan Zhang, Xiu Li, Biqing Qi, Wanli Ouyang, and Bowen Zhou. Can 1b llm surpass 405b llm? rethinking compute-optimal test-time scaling. *arXiv preprint arXiv:2502.06703*, 2025.
- [47] Yang Liu, Dan Iter, Yichong Xu, Shuohang Wang, Ruochen Xu, and Chenguang Zhu. G-eval: Nlg evaluation using gpt-4 with better human alignment. *ArXiv Preprint arXiv:2303.16634*, 2023.
- [48] Meta. The Llama 4 herd: The beginning of a new era of natively multimodal AI innovation, 4 2025. Accessed: 2025-05-12.
- [49] Xiaoyu Tan Minghao Yang, Chao Qu. Inf-orm-llama3.1-70b, 2024.
- [50] Rodrigo Nogueira and Kyunghyun Cho. Passage re-ranking with bert, 2020.
- [51] OpenAI. GPT-4 Technical Report. *ArXiv Preprint arXiv:2303.08774*, 2023.
- [52] OpenAI. Openai o3-mini system card. Technical report, OpenAI, January 2025. Publication.

- [53] Long Ouyang, Jeffrey Wu, Xu Jiang, Diogo Almeida, Carroll Wainwright, Pamela Mishkin, Chong Zhang, Sandhini Agarwal, Katarina Slama, Alex Ray, et al. Training language models to follow instructions with human feedback. Advances in Neural Information Processing Systems, 35:27730–27744, 2022.
- [54] Qian Pan, Zahra Ashktorab, Michael Desmond, Martín Santillán Cooper, James Johnson, Rahul Nair, Elizabeth Daly, and Werner Geyer. Human-Centered Design Recommendations for LLM-as-a-judge. In Proceedings of the 1st Human-Centered Large Language Modeling Workshop, pages 16–29, 2024.
- [55] Isha Puri, Shivchander Sudalairaj, Guangxuan Xu, Kai Xu, and Akash Srivastava. A probabilistic inference approach to inference-time scaling of llms using particle-based monte carlo methods, 2025.
- [56] Alexander Ratner, Stephen H Bach, Henry Ehrenberg, Jason Fries, Sen Wu, and Christopher Ré. Snorkel: rapid training data creation with weak supervision. The VLDB Journal, 29(2):709–730, 2020.
- [57] Alexander Ratner, Braden Hancock, Jared Dunnmon, Frederic Sala, Shreyash Pandey, and Christopher Ré. Training complex models with multi-task weak supervision. In Proceedings of the AAAI Conference on Artificial Intelligence, volume 33, pages 4763–4771, 2019.
- [58] Alexander J Ratner, Christopher M De Sa, Sen Wu, Daniel Selsam, and Christopher Ré. Data programming: Creating large training sets, quickly. Advances in neural information processing systems, 29, 2016.
- [59] Selvan Sunitha Ravi, Bartosz Mielczarek, Anand Kannappan, Douwe Kiela, and Rebecca Qian. Lynx: An Open Source Hallucination Evaluation Model, 2024.
- [60] Nils Reimers and Iryna Gurevych. Sentence-bert: Sentence embeddings using siamese bert-networks. In Conference on Empirical Methods in Natural Language Processing, 2019.
- [61] Nils Reimers and Iryna Gurevych. Making monolingual sentence embeddings multilingual using knowledge distillation. In Proceedings of the 2020 Conference on Empirical Methods in Natural Language Processing. Association for Computational Linguistics, 11 2020.
- [62] David Rein, Betty Li Hou, Asa Cooper Stickland, Jackson Petty, Richard Yuanzhe Pang, Julien Dirani, Julian Michael, and Samuel R. Bowman. GPQA: A graduate-level google-proof q&a benchmark. In First Conference on Language Modeling, 2024.
- [63] Saharon Rosset, Ji Zhu, and Trevor Hastie. Margin maximizing loss functions. Advances in neural information processing systems, 16, 2003.
- [64] Jon Saad-Falcon, Omar Khattab, Christopher Potts, and Matei Zaharia. ARES: An Automated Evaluation Framework for Retrieval-Augmented Generation Systems. ArXiv Preprint arXiv:2311.09476, 2023.
- [65] Robert E Schapire. Explaining adaboost. In Empirical inference: festschrift in honor of vladimir N. Vapnik, pages 37–52. Springer, 2013.
- [66] Changho Shin, Winfred Li, Harit Vishwakarma, Nicholas Roberts, and Frederic Sala. Universalizing weak supervision. arXiv preprint arXiv:2112.03865, 2021.
- [67] Prasann Singhal, Tanya Goyal, Jiacheng Xu, and Greg Durrett. A long way to go: Investigating length correlations in rlhf. ArXiv Preprint arXiv:2310.03716, 2023.
- [68] Nishad Singhi, Hritik Bansal, Arian Hosseini, Aditya Grover, Kai-Wei Chang, Marcus Rohrbach, and Anna Rohrbach. When to solve, when to verify: Compute-optimal problem solving and generative verification for llm reasoning, 2025.
- [69] Nishad Singhi, Hritik Bansal, Arian Hosseini, Aditya Grover, Kai-Wei Chang, Marcus Rohrbach, and Anna Rohrbach. When to solve, when to verify: Compute-optimal problem solving and generative verification for llm reasoning, 2025.



- [70] Charlie Snell, Jaehoon Lee, Kelvin Xu, and Aviral Kumar. Scaling llm test-time compute optimally can be more effective than scaling model parameters, 2024.
- [71] Mingyang Song, Zhaochen Su, Xiaoye Qu, Jiawei Zhou, and Yu Cheng. Prmbench: A fine-grained and challenging benchmark for process-level reward models, 2025.
- [72] Yuda Song, Hanlin Zhang, Carson Eisenach, Sham Kakade, Dean Foster, and Udaya Ghai. Mind the gap: Examining the self-improvement capabilities of large language models, 2025.
- [73] Benedikt Stroebel, Sayash Kapoor, and Arvind Narayanan. Inference scaling flaws: The limits of llm resampling with imperfect verifiers, 2024.
- [74] Mirac Suzgun, Nathan Scales, Nathanael Schärli, Sebastian Gehrmann, Yi Tay, Hyung Won Chung, Aakanksha Chowdhery, Quoc V. Le, Ed H. Chi, Denny Zhou, and Jason Wei. Challenging big-bench tasks and whether chain-of-thought can solve them, 2022.
- [75] Liyan Tang, Philippe Laban, and Greg Durrett. MiniCheck: Efficient Fact-Checking of LLMs on Grounding Documents, 2024.
- [76] Pat Verga, Sebastian Hofstätter, Sophia Althammer, Yixuan Su, Aleksandra Piktus, Arkady Arkhangorodsky, Minjie Xu, Naomi White, and Patrick Lewis. Replacing judges with juries: Evaluating llm generations with a panel of diverse models, 2024.
- [77] Harit Vishwakarma and Frederic Sala. Lifting weak supervision to structured prediction. *Advances in Neural Information Processing Systems*, 35:37563–37574, 2022.
- [78] Binghai Wang, Rui Zheng, Lu Chen, Yan Liu, Shihan Dou, Caishuang Huang, Wei Shen, Senjie Jin, Enyu Zhou, Chenyu Shi, Songyang Gao, Nuo Xu, Yuhao Zhou, Xiaoran Fan, Zhiheng Xi, Jun Zhao, Xiao Wang, Tao Ji, Hang Yan, Lixing Shen, Zhan Chen, Tao Gui, Qi Zhang, Xipeng Qiu, Xuanjing Huang, Zuxuan Wu, and Yu-Gang Jiang. Secrets of RLHF in Large Language Models Part II: Reward Modeling, 2024.
- [79] Haoxiang Wang, Wei Xiong, Tengyang Xie, Han Zhao, and Tong Zhang. Interpretable preferences via multi-objective reward modeling and mixture-of-experts. *ArXiv Preprint arXiv:2406.12845*.
- [80] Jiaan Wang, Yunlong Liang, Fandong Meng, Zengkui Sun, Haoxiang Shi, Zhixu Li, Jinan Xu, Jianfeng Qu, and Jie Zhou. Is ChatGPT a good NLG Evaluator? A Preliminary Study. *ArXiv Preprint arXiv:2303.04048*, 2023.
- [81] Junlin Wang, Roy Xie, Shang Zhu, Jue Wang, Ben Athiwaratkun, Bhuwan Dhingra, Shuaiwen Leon Song, Ce Zhang, and James Zou. Improving model alignment through collective intelligence of open-source llms, 2025.
- [82] Yubo Wang, Xueguang Ma, Ge Zhang, Yuansheng Ni, Abhramil Chandra, Shiguang Guo, Weiming Ren, Aaran Arulraj, Xuan He, Ziyang Jiang, et al. Mmlu-pro: A more robust and challenging multi-task language understanding benchmark. *arXiv preprint arXiv:2406.01574*, 2024.
- [83] Zhilin Wang, Yi Dong, Jiaqi Zeng, Virginia Adams, Makesh Narsimhan Sreedhar, Daniel Egert, Olivier Delalleau, Jane Polak Scowcroft, Neel Kant, Aidan Swope, and Oleksii Kuchaiev. HelpSteer: Multi-Attribute Helpfulness Dataset for SteerLM, 2023.
- [84] Zihao Wang, Chirag Nagpal, Jonathan Berant, Jacob Eisenstein, Alex D’Amour, Sanmi Koyejo, and Victor Veitch. Transforming and combining rewards for aligning large language models. *arXiv preprint arXiv:2402.00742*, 2024.
- [85] Benjamin Warner, Antoine Chaffin, Benjamin Clavié, Orion Weller, Oskar Hallström, Said Taghadouini, Alexis Gallagher, Raja Biswas, Faisal Ladhak, Tom Aarsen, Nathan Cooper, Griffin Adams, Jeremy Howard, and Iacopo Poli. Smarter, better, faster, longer: A modern bidirectional encoder for fast, memory efficient, and long context finetuning and inference, 2024.
- [86] Jason Wei, Xuezhi Wang, Dale Schuurmans, Maarten Bosma, Brian Ichter, Fei Xia, Ed Chi, Quoc Le, and Denny Zhou. Chain-of-thought prompting elicits reasoning in large language models, 2023.

- 565 [87] Peter West and Christopher Potts. Base models beat aligned models at randomness and creativity,  
566 2025.
- 567 [88] Tengyu Xu, Eryk Helenowski, Karthik Abinav Sankararaman, Di Jin, Kaiyan Peng, Eric Han,  
568 Shaoliang Nie, Chen Zhu, Hejia Zhang, Wenxuan Zhou, Zhouhao Zeng, Yun He, Karishma  
569 Mandyam, Arya Talabzadeh, Madian Khabsa, Gabriel Cohen, Yuandong Tian, Hao Ma, Sinong  
570 Wang, and Han Fang. The perfect blend: Redefining rlhf with mixture of judges, 2024.
- 571 [89] LU Ying et al. Decision tree methods: applications for classification and prediction. Shanghai  
572 archives of psychiatry, 27(2):130, 2015.
- 573 [90] Lifan Yuan, Wendi Li, Huayu Chen, Ganqu Cui, Ning Ding, Kaiyan Zhang, Bowen Zhou,  
574 Zhiyuan Liu, and Hao Peng. Free process rewards without process labels. arXiv preprint  
575 arXiv:2412.01981, 2024.
- 576 [91] Yang Yue, Zhiqi Chen, Rui Lu, Andrew Zhao, Zhaokai Wang, Yang Yue, Shiji Song, and Gao  
577 Huang. Does reinforcement learning really incentivize reasoning capacity in llms beyond the  
578 base model?, 2025.
- 579 [92] Lunjun Zhang, Arian Hosseini, Hritik Bansal, Mehran Kazemi, Aviral Kumar, and Rishabh  
580 Agarwal. Generative Verifiers: Reward Modeling as Next-Token Prediction, 2024.
- 581 [93] Eric Zhao, Pranjal Awasthi, and Sreenivas Gollapudi. Sample, scrutinize and scale: Effective  
582 inference-time search by scaling verification. arXiv preprint arXiv:2502.01839, 2025.
- 583 [94] Kunhao Zheng, Jesse Michael Han, and Stanislas Polu. Minif2f: a cross-system benchmark for  
584 formal olympiad-level mathematics, 2022.
- 585 [95] Lianmin Zheng, Wei-Lin Chiang, Ying Sheng, Siyuan Zhuang, Zhanghao Wu, Yonghao Zhuang,  
586 Zi Lin, Zhuohan Li, Dacheng Li, Eric. P Xing, Hao Zhang, Joseph E. Gonzalez, and Ion Stoica.  
587 Judging llm-as-a-judge with mt-bench and chatbot arena, 2023.
- 588 [96] Lianmin Zheng, Dacheng Xu, Jiajun Dong, Andy Zeng, Shuo Xie, Eric P Xing, and Percy Liang.  
589 Evaluation Biases for Large Language Models. ArXiv Preprint arXiv:2305.17926, 2023.

## NeurIPS Paper Checklist

### 1. Claims

Question: Do the main claims made in the abstract and introduction accurately reflect the paper's contributions and scope?

Answer: [Yes]

Justification: We ensure our claims in the abstract and introduction accurately reflect our paper's contributions and scope. We clearly state our approach using weak supervision, the evaluation context, and the specific performance improvements achieved with WEAVER.

Guidelines:

- The answer NA means that the abstract and introduction do not include the claims made in the paper.
- The abstract and/or introduction should clearly state the claims made, including the contributions made in the paper and important assumptions and limitations. A No or NA answer to this question will not be perceived well by the reviewers.
- The claims made should match theoretical and experimental results, and reflect how much the results can be expected to generalize to other settings.
- It is fine to include aspirational goals as motivation as long as it is clear that these goals are not attained by the paper.

### 2. Limitations

Question: Does the paper discuss the limitations of the work performed by the authors?

Answer: [Yes]

Justification: We discuss limitations in Section 7, addressing specialized verifier development, dataset distribution challenges, and concrete directions for improvement like extending WEAVER to RLHF and multi-modal verification.

Guidelines:

- The answer NA means that the paper has no limitation while the answer No means that the paper has limitations, but those are not discussed in the paper.
- The authors are encouraged to create a separate "Limitations" section in their paper.
- The paper should point out any strong assumptions and how robust the results are to violations of these assumptions (e.g., independence assumptions, noiseless settings, model well-specification, asymptotic approximations only holding locally). The authors should reflect on how these assumptions might be violated in practice and what the implications would be.
- The authors should reflect on the scope of the claims made, e.g., if the approach was only tested on a few datasets or with a few runs. In general, empirical results often depend on implicit assumptions, which should be articulated.
- The authors should reflect on the factors that influence the performance of the approach. For example, a facial recognition algorithm may perform poorly when image resolution is low or images are taken in low lighting. Or a speech-to-text system might not be used reliably to provide closed captions for online lectures because it fails to handle technical jargon.
- The authors should discuss the computational efficiency of the proposed algorithms and how they scale with dataset size.
- If applicable, the authors should discuss possible limitations of their approach to address problems of privacy and fairness.
- While the authors might fear that complete honesty about limitations might be used by reviewers as grounds for rejection, a worse outcome might be that reviewers discover limitations that aren't acknowledged in the paper. The authors should use their best judgment and recognize that individual actions in favor of transparency play an important role in developing norms that preserve the integrity of the community. Reviewers will be specifically instructed to not penalize honesty concerning limitations.

### 3. Theory assumptions and proofs

Question: For each theoretical result, does the paper provide the full set of assumptions and a complete (and correct) proof?

Answer: [Yes]

Justification: We provide theoretical foundations for our weak supervision approach in Sections 4.2.1 and Appendix B.1, including assumptions and complete proofs. Our mathematical formulations for the Discrete Weak Supervision Model include all necessary equations and derivations.

Guidelines:

- The answer NA means that the paper does not include theoretical results.
- All the theorems, formulas, and proofs in the paper should be numbered and cross-referenced.
- All assumptions should be clearly stated or referenced in the statement of any theorems.
- The proofs can either appear in the main paper or the supplemental material, but if they appear in the supplemental material, the authors are encouraged to provide a short proof sketch to provide intuition.
- Inversely, any informal proof provided in the core of the paper should be complemented by formal proofs provided in appendix or supplemental material.
- Theorems and Lemmas that the proof relies upon should be properly referenced.

#### 4. Experimental result reproducibility

Question: Does the paper fully disclose all the information needed to reproduce the main experimental results of the paper to the extent that it affects the main claims and/or conclusions of the paper (regardless of whether the code and data are provided or not)?

Answer: [Yes]

Justification: We thoroughly disclose information needed to reproduce our main experimental results, specifying datasets, models, verification techniques, and evaluation metrics. We provide implementation details of WEAVER in Appendix B.4 along with our code repository.

Guidelines:

- The answer NA means that the paper does not include experiments.
- If the paper includes experiments, a No answer to this question will not be perceived well by the reviewers: Making the paper reproducible is important, regardless of whether the code and data are provided or not.
- If the contribution is a dataset and/or model, the authors should describe the steps taken to make their results reproducible or verifiable.
- Depending on the contribution, reproducibility can be accomplished in various ways. For example, if the contribution is a novel architecture, describing the architecture fully might suffice, or if the contribution is a specific model and empirical evaluation, it may be necessary to either make it possible for others to replicate the model with the same dataset, or provide access to the model. In general, releasing code and data is often one good way to accomplish this, but reproducibility can also be provided via detailed instructions for how to replicate the results, access to a hosted model (e.g., in the case of a large language model), releasing of a model checkpoint, or other means that are appropriate to the research performed.
- While NeurIPS does not require releasing code, the conference does require all submissions to provide some reasonable avenue for reproducibility, which may depend on the nature of the contribution. For example
  - (a) If the contribution is primarily a new algorithm, the paper should make it clear how to reproduce that algorithm.
  - (b) If the contribution is primarily a new model architecture, the paper should describe the architecture clearly and fully.
  - (c) If the contribution is a new model (e.g., a large language model), then there should either be a way to access this model for reproducing the results or a way to reproduce the model (e.g., with an open-source dataset or instructions for how to construct the dataset).

- (d) We recognize that reproducibility may be tricky in some cases, in which case authors are welcome to describe the particular way they provide for reproducibility. In the case of closed-source models, it may be that access to the model is limited in some way (e.g., to registered users), but it should be possible for other researchers to have some path to reproducing or verifying the results.

## 5. Open access to data and code

Question: Does the paper provide open access to the data and code, with sufficient instructions to faithfully reproduce the main experimental results, as described in supplemental material?

Answer: [Yes]

Justification: In our supplementary materials, we provide a code repository for our WEAVER implementation along with access to all datasets used in our experiments. Furthermore, our methodology is also described in sufficient detail for reproducibility in the paper in Sections 3 and 4.

Guidelines:

- The answer NA means that paper does not include experiments requiring code.
- Please see the NeurIPS code and data submission guidelines (<https://nips.cc/public/guides/CodeSubmissionPolicy>) for more details.
- While we encourage the release of code and data, we understand that this might not be possible, so “No” is an acceptable answer. Papers cannot be rejected simply for not including code, unless this is central to the contribution (e.g., for a new open-source benchmark).
- The instructions should contain the exact command and environment needed to run to reproduce the results. See the NeurIPS code and data submission guidelines (<https://nips.cc/public/guides/CodeSubmissionPolicy>) for more details.
- The authors should provide instructions on data access and preparation, including how to access the raw data, preprocessed data, intermediate data, and generated data, etc.
- The authors should provide scripts to reproduce all experimental results for the new proposed method and baselines. If only a subset of experiments are reproducible, they should state which ones are omitted from the script and why.
- At submission time, to preserve anonymity, the authors should release anonymized versions (if applicable).
- Providing as much information as possible in supplemental material (appended to the paper) is recommended, but including URLs to data and code is permitted.

## 6. Experimental setting/details

Question: Does the paper specify all the training and test details (e.g., data splits, hyper-parameters, how they were chosen, type of optimizer, etc.) necessary to understand the results?

Answer: [Yes]

Justification: We clearly specify all training and test details necessary to understand our results in Section 4 and Appendix C. We include details about models, datasets, parameter settings, and evaluation metrics.

Guidelines:

- The answer NA means that the paper does not include experiments.
- The experimental setting should be presented in the core of the paper to a level of detail that is necessary to appreciate the results and make sense of them.
- The full details can be provided either with the code, in appendix, or as supplemental material.

## 7. Experiment statistical significance

Question: Does the paper report error bars suitably and correctly defined or other appropriate information about the statistical significance of the experiments?

Answer: [Yes]



Justification: For each of our tables and figures, we perform 5-10 runs and report the average of the runs. We report the standard deviation of these results in Appx. C. We also report statistical significance through trend analysis across multiple datasets with power-law fitting in Appx. C, including  $R^2$  values to demonstrate the quality of fit and reliability of our scaling trends.

Guidelines:

- The answer NA means that the paper does not include experiments.
- The authors should answer "Yes" if the results are accompanied by error bars, confidence intervals, or statistical significance tests, at least for the experiments that support the main claims of the paper.
- The factors of variability that the error bars are capturing should be clearly stated (for example, train/test split, initialization, random drawing of some parameter, or overall run with given experimental conditions).
- The method for calculating the error bars should be explained (closed form formula, call to a library function, bootstrap, etc.)
- The assumptions made should be given (e.g., Normally distributed errors).
- It should be clear whether the error bar is the standard deviation or the standard error of the mean.
- It is OK to report 1-sigma error bars, but one should state it. The authors should preferably report a 2-sigma error bar than state that they have a 96% CI, if the hypothesis of Normality of errors is not verified.
- For asymmetric distributions, the authors should be careful not to show in tables or figures symmetric error bars that would yield results that are out of range (e.g. negative error rates).
- If error bars are reported in tables or plots, The authors should explain in the text how they were calculated and reference the corresponding figures or tables in the text.

## 8. Experiments compute resources

Question: For each experiment, does the paper provide sufficient information on the computer resources (type of compute workers, memory, time of execution) needed to reproduce the experiments?

Answer: [Yes]

Justification: We include the GPUS, workers, memory, and storage requirements needed for running the experiments in Appendix D.1.

Guidelines:

- The answer NA means that the paper does not include experiments.
- The paper should indicate the type of compute workers CPU or GPU, internal cluster, or cloud provider, including relevant memory and storage.
- The paper should provide the amount of compute required for each of the individual experimental runs as well as estimate the total compute.
- The paper should disclose whether the full research project required more compute than the experiments reported in the paper (e.g., preliminary or failed experiments that didn't make it into the paper).

## 9. Code of ethics

Question: Does the research conducted in the paper conform, in every respect, with the NeurIPS Code of Ethics <https://neurips.cc/public/EthicsGuidelines>?

Answer: [Yes]

Justification: Our research conforms to the NeurIPS Code of Ethics, focusing on improving AI efficiency through better verification methods. Our work aims to improve AI capabilities responsibly without introducing harmful applications.

Guidelines:

- The answer NA means that the authors have not reviewed the NeurIPS Code of Ethics.
- If the authors answer No, they should explain the special circumstances that require a deviation from the Code of Ethics.

- The authors should make sure to preserve anonymity (e.g., if there is a special consideration due to laws or regulations in their jurisdiction).

## 10. Broader impacts

Question: Does the paper discuss both potential positive societal impacts and negative societal impacts of the work performed?

Answer: [Yes]

Justification: We discuss broader impacts in Section 8, highlighting potential positive impacts like improving language model reliability through better verification. Our research doesn't introduce significant negative societal impacts.

Guidelines:

- The answer NA means that there is no societal impact of the work performed.
- If the authors answer NA or No, they should explain why their work has no societal impact or why the paper does not address societal impact.
- Examples of negative societal impacts include potential malicious or unintended uses (e.g., disinformation, generating fake profiles, surveillance), fairness considerations (e.g., deployment of technologies that could make decisions that unfairly impact specific groups), privacy considerations, and security considerations.
- The conference expects that many papers will be foundational research and not tied to particular applications, let alone deployments. However, if there is a direct path to any negative applications, the authors should point it out. For example, it is legitimate to point out that an improvement in the quality of generative models could be used to generate deepfakes for disinformation. On the other hand, it is not needed to point out that a generic algorithm for optimizing neural networks could enable people to train models that generate Deepfakes faster.
- The authors should consider possible harms that could arise when the technology is being used as intended and functioning correctly, harms that could arise when the technology is being used as intended but gives incorrect results, and harms following from (intentional or unintentional) misuse of the technology.
- If there are negative societal impacts, the authors could also discuss possible mitigation strategies (e.g., gated release of models, providing defenses in addition to attacks, mechanisms for monitoring misuse, mechanisms to monitor how a system learns from feedback over time, improving the efficiency and accessibility of ML).

## 11. Safeguards

Question: Does the paper describe safeguards that have been put in place for responsible release of data or models that have a high risk for misuse (e.g., pretrained language models, image generators, or scraped datasets)?

Answer: [NA]

Justification: Our paper doesn't release high-risk data or models that would require safeguards. Our focus is on verification methodology rather than artifacts with misuse potential.

Guidelines:

- The answer NA means that the paper poses no such risks.
- Released models that have a high risk for misuse or dual-use should be released with necessary safeguards to allow for controlled use of the model, for example by requiring that users adhere to usage guidelines or restrictions to access the model or implementing safety filters.
- Datasets that have been scraped from the Internet could pose safety risks. The authors should describe how they avoided releasing unsafe images.
- We recognize that providing effective safeguards is challenging, and many papers do not require this, but we encourage authors to take this into account and make a best faith effort.

## 12. Licenses for existing assets

Question: Are the creators or original owners of assets (e.g., code, data, models), used in the paper, properly credited and are the license and terms of use explicitly mentioned and properly respected?

Answer: [Yes]

Justification: We properly cite and credit the creators of all assets used, including datasets and language models as listed in Table 13. We respect the licenses of all models and datasets referenced in our work in Appx. C.1.

Guidelines:

- The answer NA means that the paper does not use existing assets.
- The authors should cite the original paper that produced the code package or dataset.
- The authors should state which version of the asset is used and, if possible, include a URL.
- The name of the license (e.g., CC-BY 4.0) should be included for each asset.
- For scraped data from a particular source (e.g., website), the copyright and terms of service of that source should be provided.
- If assets are released, the license, copyright information, and terms of use in the package should be provided. For popular datasets, [paperswithcode.com/datasets](https://paperswithcode.com/datasets) has curated licenses for some datasets. Their licensing guide can help determine the license of a dataset.
- For existing datasets that are re-packaged, both the original license and the license of the derived asset (if it has changed) should be provided.
- If this information is not available online, the authors are encouraged to reach out to the asset’s creators.

### 13. New assets

Question: Are new assets introduced in the paper well documented and is the documentation provided alongside the assets?

Answer: [Yes]

Justification: We release our WEAVER implementation code and the configuration files used in our supplementary materials. We provide documentation for these assets alongside our code repository.

Guidelines:

- The answer NA means that the paper does not release new assets.
- Researchers should communicate the details of the dataset/code/model as part of their submissions via structured templates. This includes details about training, license, limitations, etc.
- The paper should discuss whether and how consent was obtained from people whose asset is used.
- At submission time, remember to anonymize your assets (if applicable). You can either create an anonymized URL or include an anonymized zip file.

### 14. Crowdsourcing and research with human subjects

Question: For crowdsourcing experiments and research with human subjects, does the paper include the full text of instructions given to participants and screenshots, if applicable, as well as details about compensation (if any)?

Answer: [NA]

Justification: Our paper doesn’t involve crowdsourcing or research with human subjects. We use existing datasets and computational experiments without human participants.

Guidelines:

- The answer NA means that the paper does not involve crowdsourcing nor research with human subjects.
- Including this information in the supplemental material is fine, but if the main contribution of the paper involves human subjects, then as much detail as possible should be included in the main paper.
- According to the NeurIPS Code of Ethics, workers involved in data collection, curation, or other labor should be paid at least the minimum wage in the country of the data collector.

905 **15. Institutional review board (IRB) approvals or equivalent for research with human**  
906 **subjects**

907 Question: Does the paper describe potential risks incurred by study participants, whether such  
908 risks were disclosed to the subjects, and whether Institutional Review Board (IRB) approvals  
909 (or an equivalent approval/review based on the requirements of your country or institution)  
910 were obtained?

911 Answer: [NA]

912 Justification: [Since our paper doesn't involve human subjects research, no IRB approval was](#)  
913 [required.](#)

914 Guidelines:

- 915 • The answer NA means that the paper does not involve crowdsourcing nor research with  
916 human subjects.
- 917 • Depending on the country in which research is conducted, IRB approval (or equivalent)  
918 may be required for any human subjects research. If you obtained IRB approval, you  
919 should clearly state this in the paper.
- 920 • We recognize that the procedures for this may vary significantly between institutions  
921 and locations, and we expect authors to adhere to the NeurIPS Code of Ethics and the  
922 guidelines for their institution.
- 923 • For initial submissions, do not include any information that would break anonymity (if  
924 applicable), such as the institution conducting the review.

925 **16. Declaration of LLM usage**

926 Question: Does the paper describe the usage of LLMs if it is an important, original, or  
927 non-standard component of the core methods in this research? Note that if the LLM is used  
928 only for writing, editing, or formatting purposes and does not impact the core methodology,  
929 scientific rigor, or originality of the research, declaration is not required.

930 Answer: [NA]

931 Justification: [The core method development in our research does not involve LLMs as](#)  
932 [important components. We evaluate language models but didn't use them in developing our](#)  
933 [research methodology.](#)

934 Guidelines:

- 935 • The answer NA means that the core method development in this research does not involve  
936 LLMs as any important, original, or non-standard components.
- 937 • Please refer to our LLM policy (<https://neurips.cc/Conferences/2025/LLM>)  
938 for what should or should not be described.

|     |                                                                          |
|-----|--------------------------------------------------------------------------|
| 939 | <b>A Table of Contents</b>                                               |
| 940 | 1. <b>WEAVER Methodology</b> (Appendix B)                                |
| 941 | (a) Discrete Weak Supervision Model with Known Difficulty (Appendix B.1) |
| 942 | (b) Practical Considerations for WEAVER (Appendix B.2)                   |
| 943 | (c) Implementation Decisions for WEAVER (Appendix B.2.2)                 |
| 944 | 2. <b>Experiments:</b> (Appendix C)                                      |
| 945 | (a) Models and Datasets (Appendix C.1)                                   |
| 946 | (b) Verification Baselines (Appendix C.2)                                |
| 947 | (c) Scaling Trends of WEAVER (Appendix C.3)                              |
| 948 | (d) Scaling Candidate Generations (Appendix C.4)                         |
| 949 | (e) Scaling Verifier Count (Appendix C.5)                                |
| 950 | (f) Weaver Distillation (Appendix C.6)                                   |
| 951 | (g) Individual Verifier Optimization (Appendix C.7)                      |
| 952 | 3. <b>Miscellaneous</b> (Appendix D)                                     |
| 953 | (a) Compute Requirements (Appendix D.1)                                  |



## B WEAVER Methodology

### B.1 Weak Supervision Model

We can construct a data generating model over response correctness  $y$  and the binary verifier outputs  $\bar{s}$ . The model is defined as:

Response Correctness:  $y_{ij} \sim \text{Bernoulli}(\pi) \forall i \in [n], j \in [K]$ ,

Verifier Score:  $\bar{s}_{ijk} | y_{ij} \sim \begin{cases} \text{Bernoulli}(w_{k,1}), & \text{if } y_{ij} = 1, \\ \text{Bernoulli}(1 - w_{k,0}), & \text{if } y_{ij} = 0, \end{cases} \forall i \in [n], j \in [K], k \in [m]$

where:

- $\pi$  is the probability that a response is correct.
- $w_{k,1}$  is the true positive rate (TPR) of verifier  $k$ , and  $w_{k,0}$  is the true negative rate (TNR), which we refer to as the verifier's *accuracy parameters*.

Here, each verifier  $k$  emits a binary score  $\bar{s}_{ijk} \in \{0,1\}$ , which is assumed to be a noisy indicator of whether response  $y_{ij}$  is correct. The likelihood of the verifier's binary output  $X_{ijk} \in \{0,1\}$  is:

$$\Pr(S_k = \bar{s}_{ijk} | Y = y_{ij}) = \begin{cases} w_{k,1}, & \text{if } y_{ij} = 1 \text{ and } \bar{s}_{ijk} = 1, \\ 1 - w_{k,1}, & \text{if } y_{ij} = 1 \text{ and } \bar{s}_{ijk} = 0, \\ w_{k,0}, & \text{if } y_{ij} = 0 \text{ and } \bar{s}_{ijk} = 0, \\ 1 - w_{k,0}, & \text{if } y_{ij} = 0 \text{ and } \bar{s}_{ijk} = 1. \end{cases}$$

We are interested in estimating the correctness of a response  $y_{ij} \in \{0,1\}$  based on assessments from multiple verifiers  $\bar{s}_{ij} = \{\bar{s}_{ij1}, \bar{s}_{ij2}, \dots, \bar{s}_{ijm}\}$ . Applying Bayes' Rule, we get:

$$\Pr(y_{ij} = 1 | S = \bar{s}_{ij}) = \frac{\Pr(S = \bar{s}_{ij} | y_{ij} = 1) \Pr(y_{ij} = 1)}{\Pr(\bar{s}_{ij})} \quad (6)$$

where  $\Pr(\bar{s}_{ij}) = \sum_{y' \in \{0,1\}} \Pr(\bar{s}_{ij} | y_{ij} = y') \Pr(y_{ij} = y')$ .

Eq. (6) requires evaluating the full conditional likelihood:

$$\Pr(S = \bar{s}_{ij} | y_{ij}) = \Pr(S_1 = \bar{s}_{ij1}, S_2 = \bar{s}_{ij2}, \dots, S_m = \bar{s}_{ijm} | y_{ij}),$$

which is a joint distribution over  $m$  binary random variables. Since each verifier  $S_k \in \{0,1\}$  is binary, then there are  $2^m$  possible verifier output configurations for  $S \in \{0,1\}^m$ . This results in  $2^m - 1$  free parameters per class label to construct the distribution  $\Pr(S = \bar{s}_{ij} | y_{ij})$ .

**Conditional Independence Assumption** To avoid this exponential blowup, we can assume that the verifiers provide *conditionally independent* outputs:

$$P(S | y) = \prod_{k=1}^m P(S_k | y),$$

which reduces the number of parameters from  $O(2^m)$  to  $O(m)$  and enables efficient inference, under the assumption that each verifier provides unique information about the correctness of a response.

Then, Eq. (6) simplifies to a Naive Bayes-style estimator:

$$\begin{aligned} \Pr(y_{ij} = 1 | S = \bar{s}_{ij}) &= \frac{\Pr(S_1 = \bar{s}_{ij1}, \dots, S_m = \bar{s}_{ijm} | y_{ij} = 1) \Pr(y_{ij} = 1)}{\Pr(S = \bar{s}_{ij})} \\ &= \frac{\Pr(y_{ij} = 1) \prod_{k=1}^m \Pr(S_k = \bar{s}_{ijk} | y_{ij} = 1)}{\sum_{y' \in \{0,1\}} \Pr(y_{ij} = y') \prod_{k=1}^m \Pr(S_k = \bar{s}_{ijk} | y_{ij} = y')} \end{aligned} \quad (7)$$

The parameters in Eq. (7) include:

- The prior probability of correctness  $\pi = \Pr(y_{ij} = 1)$ .
- The verifier-specific conditional likelihoods  $P(S_k | y_{ij})$ .

### 980 B.1.1 Parameter Estimation

981 **Supervised Setting** When ground-truth labels  $y_{ij}$  are available, parameter estimation reduces to  
 982 computing empirical frequencies. We can estimate the prior as:

$$\hat{\pi} = \frac{1}{N} \sum_{i,j} \mathbf{1}\{y_{ij} = 1\}$$

983 For each verifier  $k$ , we could estimate:

$$\begin{aligned} \hat{w}_{k,1} &= \frac{\sum_{i,j} \mathbf{1}\{y_{ij} = 1\} \cdot \mathbf{1}\{S_k = 1\}}{\sum_{i,j} \mathbf{1}\{y_{ij} = 1\}}, \\ \hat{w}_{k,0} &= \frac{\sum_{i,j} \mathbf{1}\{y_{ij} = 0\} \cdot \mathbf{1}\{S_k = 0\}}{\sum_{i,j} \mathbf{1}\{y_{ij} = 0\}}. \end{aligned}$$

984 **Weak Supervised Setting** When a few labeled  $y_{ij}$  are available, we can use it to estimate  $\pi$ , but we  
 985 still need to estimate the verifier accuracy parameters  $w_{k,1}, w_{k,0}$  to compute  $\prod_{k=1}^m \Pr(S_k = \bar{s}_{ijk} | y_{ij} =$   
 986  $1)$ . Instead of using labeled data, we estimate accuracy parameters using moment matching. In  
 987 particular, we match observable second moments of verifier outputs to the model-implied moments  
 988 under conditional independence assumptions, based on an approach from [27].

989 **Pairwise Statistics.** For each pair of verifiers  $k_1, k_2$  and binary outputs  $a, b \in \{0, 1\}$ , we can express  
 990 the joint probability of their outputs using the marginalization rule and the conditional independence  
 991 assumption:

$$\begin{aligned} &\Pr(S_{k_1} = a, S_{k_2} = b) \\ &= \Pr(S_{k_1} = a | Y = 1) \Pr(S_{k_2} = a | Y = 1) \Pr(Y = 1) + \Pr(S_{k_1} = b | Y = 0) \Pr(S_{k_2} = b | Y = 0) \Pr(Y = 0) \end{aligned} \quad (8)$$

992 where the conditional distributions for verifier  $k$  are:

$$\Pr(S_k = a | y = 1) = \begin{cases} w_{k,1}, & a = 1, \\ 1 - w_{k,1}, & a = 0, \end{cases} \quad \Pr(S_k = a | y = 0) = \begin{cases} 1 - w_{k,0}, & a = 1, \\ w_{k,0}, & a = 0. \end{cases}$$

993 **Marginal Statistics.** Similarly, each verifier's marginal distribution can be written as:

$$\Pr(S_k = 1) = \Pr(S_k = 1 | Y = 1) \Pr(Y = 1) + \Pr(S_k = 1 | Y = 0) \Pr(Y = 0) \quad (9)$$

994 Note that this equation holds true regardless of the conditional independence assumption.

### 995 Estimation method

- 996 • Construct the second order moment matrix  $O \in \mathbb{R}^{(2m) \times (2m)}$ , where:

$$\begin{aligned} O_{2i-1:2i, 2i-1:2i} &= \begin{bmatrix} \Pr(S_i = 0) & 0 \\ 0 & \Pr(S_i = 1) \end{bmatrix} \forall i \in [m] \\ O_{2i-1:2i, 2j-1:2j} &= \begin{bmatrix} \Pr(S_i = 0, S_j = 0) & \Pr(S_i = 0, S_j = 1) \\ \Pr(S_i = 1, S_j = 0) & \Pr(S_i = 1, S_j = 1) \end{bmatrix} \forall i \neq j \in [m] \end{aligned} \quad (10)$$

- 997 • Construct the conditional probability matrix  $\mu \in \mathbb{R}^{(2V) \times 2}$ , where each row encodes:

$$\begin{aligned} &\mu_{2k+a, b} = \Pr(S_k = a | y = b) \\ &\mu = \begin{bmatrix} w_{k_1,0} & 1 - w_{k_1,1} \\ 1 - w_{k_1,0} & w_{k_1,1} \\ \dots & \dots \\ w_{k_m,0} & 1 - w_{k_m,1} \\ 1 - w_{k_m,0} & w_{k_m,1} \end{bmatrix} \end{aligned}$$

- 999 • Label prior matrix  $P \in \mathbb{R}^{2 \times 2}$  is a diagonal matrix:

$$P = \begin{bmatrix} \Pr(y_{ij} = 0) & 0 \\ 0 & \Pr(y_{ij} = 1) \end{bmatrix}.$$

Then, equation 8 is equivalent to  $O = \mu P \mu^\top$  on the entries off of the  $2 \times 2$  block diagonal, and equation 9 is equivalent to  $\text{diag}(O) = \mu P \mathbf{1}^\top$ . Therefore, we optimize the following loss to compute  $\mu$ .

$$\text{minimize}_\mu \left\| O_{\text{off-diag}} - (\mu P \mu^\top)_{\text{off-diag}} \right\|^2 + \left\| \text{diag}(O) - \mu P \mathbf{1}^\top \right\|^2,$$

By solving via gradient-descent, we obtain estimates of the verifier accuracy parameters  $\{w_{k,1}, w_{k,0}\}$ .

### B.1.2 Inference: computing response correctness probabilities

Once the accuracy parameters  $\{w_{k,1}, w_{k,0}\}$  are estimated and  $P(y_{ij} = 1)$  is computed from a small labeled development dataset, we can compute posterior correctness probabilities for each response:

$$\begin{aligned} \Pr(y_{ij} = 1 | S = \bar{s}_{ij}) &\propto \Pr(y_{ij} = 1) \prod_{k=1}^m \Pr(S_k = \bar{s}_{ijk} | y_{ij} = 1) \\ \Pr(y_{ij} = 0 | S = \bar{s}_{ij}) &\propto \Pr(y_{ij} = 0) \prod_{k=1}^m \Pr(S_k = \bar{s}_{ijk} | y_{ij} = 0) \end{aligned}$$

Normalizing these, we have a full posterior  $P(y_{ij} = 1 | S = \bar{s}_{ij})$ , which provides a score with which we can select a response for each query.

## B.2 Adapting Weak Supervision to the Verification Setting

Given a set of verifiers, we describe two modifications to the verifiers that allow us to apply weak supervision to the verification setting. First, we discuss the motivation for how we binarize verifier outputs and filter out low-quality verifiers. These two steps before invoking Weak Supervision methods are critical, as WS assumes that verifiers are binary and are of sufficiently high signal. Second, we will describe our proposed method for binarization and filtering, along with results.

### B.2.1 Motivation

**Binarization** The weak supervision algorithm described in the prior section requires binary verifier outputs. This is suitable for verifiers such as LM judges, which produce  $\{0, 1\}$  outputs, but verifiers that are reward models often produce continuous scores at different scales. In fact, naive thresholding can result in low-signal verifiers (e.g., outputting all 1s). *How do we convert reward models' continuous verifier scores into binary scores?*

**Filtering out low-quality verifiers** Beyond directly impacting the quality of an ensemble, low-quality verifiers reduce the effectiveness of Weak Supervision algorithms. *How do we discard verifiers that have low signal?*

- **Skewed marginals:** Consider a dataset where  $\Pr(y = 1) \approx 0.5$  and we have a verifier with  $\Pr(S_k = 1) \approx 0.99$ . A skewed verifier with an extreme marginal (e.g., from naive thresholding for binarization) and near-constant outputs adds little information to the ensemble. It primarily increases noise in the objective in Eq. 5 and should thus be discarded. Yet, not all verifiers that have extreme marginals add little signal; for instance, if instead  $\Pr(y = 1) \approx 0.99$ , a skewed verifier could be highly accurate. Therefore, the definition of a low-quality verifier depends on the distribution of correct responses.
- **Breaking symmetry in the WS objective:** a common assumption of Weak Supervision is that a majority of the verifiers have better-than-random accuracy [23]. Otherwise, there is a possibility that the WS algorithm can yield non-unique solutions; the terms in Eq. 5 are the joint probabilities over pairs of verifiers as well as their marginals, which do not uniquely determine if a verifier satisfies  $w_{k,1}, w_{k,0} > 0.5$  or not. Therefore, it is critical to remove as many low-accuracy verifiers as possible to ensure that the optimization procedure converges to a unique solution.

### B.2.2 Adaptation method

We now describe our proposed method for binarization and filtering of verifiers, after which the Weak Supervision algorithm described in Appendix B.1.

Table 4: **Ablation of Development Set used for WEAVER Class Balance Estimation:** As our reward model threshold, we set it to the default of the 0.5.

| Approach | Model Size | Dev Set Size                    | Benchmarks |       |         |       |          |
|----------|------------|---------------------------------|------------|-------|---------|-------|----------|
|          |            |                                 | MATH500    | GPQA  | Diamond | MMLU  | MMLU Pro |
| WEAVER   | 70B        | Naive Threshold (0.5 Threshold) | 88.1%      | 52.0% | 92.4%   | 83.5% | 79.0%    |
| WEAVER   | 70B        | 1%                              | 90.4%      | 67.1% | 91.1%   | 87.0% | 84.5%    |
| WEAVER   | 70B        | 5%                              | 92.4%      | 72.7% | 93.5%   | 90.4% | 87.5%    |
| WEAVER   | 70B        | 20%                             | 92.4%      | 72.7% | 93.5%   | 90.4% | 87.5%    |
| WEAVER   | 70B        | 100%                            | 92.4%      | 72.7% | 93.5%   | 90.4% | 87.5%    |

Table 5: **Ablation of Verifier Selection Strategies for WEAVER:** Comparison of different strategies for dropping faulty verifiers by dataset using each verifier’s marginal probability.

| Approach | Model Size | Verifier Selection                                      | Benchmarks   |              |              |              |              |
|----------|------------|---------------------------------------------------------|--------------|--------------|--------------|--------------|--------------|
|          |            |                                                         | MATH500      | GPQA         | Diamond      | MMLU         | MMLU Pro     |
| WEAVER   | 70B        | No Dropped Verifiers                                    | 90.4%        | 52.0%        | 91.1%        | 84.2%        | 79.4%        |
| WEAVER   | 70B        | Low Marginals Dropped (Mostly Negative Verifiers)       | <b>93.4%</b> | 60.6%        | 91.7%        | <b>91.0%</b> | 84.2%        |
| WEAVER   | 70B        | High Marginals Dropped (Mostly Positive Verifiers)      | 83.4%        | 69.7%        | 87.9%        | 78.4%        | 79.9%        |
| WEAVER   | 70B        | Extreme Marginals Dropped (Mostly Positive or Negative) | 90.8%        | <b>72.7%</b> | <b>92.4%</b> | 85.0%        | <b>85.2%</b> |

Table 6: **Ablation of Adaptive Threshold Dev Set Size for WEAVER.**

| Approach | Model Size | Adaptive Threshold Dev Set Size | Benchmarks |       |         |       |          |
|----------|------------|---------------------------------|------------|-------|---------|-------|----------|
|          |            |                                 | MATH500    | GPQA  | Diamond | MMLU  | MMLU Pro |
| WEAVER   | 70B        | 0.01                            | 92.4%      | 72.7% | 93.5%   | 90.4% | 87.5%    |
| WEAVER   | 70B        | 0.05                            | 92.4%      | 72.7% | 93.5%   | 90.4% | 87.5%    |
| WEAVER   | 70B        | 0.2                             | 92.4%      | 72.7% | 93.5%   | 90.4% | 87.5%    |
| WEAVER   | 70B        | 1.0                             | 92.4%      | 72.7% | 93.5%   | 90.4% | 87.5%    |

1. **Binarization:** We use a small amount of labeled samples (which we already are using to compute  $\Pr(y=1)$ ) to determine a threshold for converting continuous verifier outputs to binary outputs. With only 5 to 10 labeled queries from benchmark development sets (which  $\leq 1\%$  of the evaluation set), we can estimate thresholds that bolster performance by averages of 8.4% for the 70B models when compared to binary splitting along the median score of the dataset (Table 4).
2. **Filtering out low-quality verifiers:** To mitigate the impact of low-quality verifiers, we prune verifiers with extreme marginal behavior, depending on the class balance. For datasets with estimated class balance between 20% and 80%, we filter out verifiers with positive rates outside this range. If a dataset has fewer than 20% positive samples overall, we remove verifiers that predict positives more than 80% of the time. Conversely, for datasets with more than 80% positives, we drop verifiers that predict positives less than 20% of the time. We find that verifier pruning leads to 12.5% performance improvement for the 70B model setting (Table 5).

Table 7: **Performance Comparison Between Continuous and Discrete Logistic Regression:** For supervised fine-tuning on the verifier scores, the continuous model consistently outperforms the discrete variant across all datasets by avoiding the lossy conversion of floats to binary votes required for the discrete variant.

| Continuous vs. Discrete Logistic Regression Performance (%) |             |             |              |             |             |
|-------------------------------------------------------------|-------------|-------------|--------------|-------------|-------------|
| Method                                                      | Dataset     |             |              |             |             |
|                                                             | MATH 500    | GPQA        | MMLU College | MMLU Pro    | BBH         |
| Discrete LR                                                 | 93.1        | 74.3        | 87.5         | 87.1        | 90.1        |
| Continuous LR                                               | <b>97.2</b> | <b>78.1</b> | <b>90.4</b>  | <b>92.0</b> | <b>96.5</b> |
| <b>Improvement</b>                                          | +4.1        | +3.8        | +2.9         | +4.9        | +6.4        |

Table 8: **Number of Unique Extracted Answers vs. Positive:Negative Sample Ratio per Query - Correlations for Llama 3.1 Instruct Models**

| Llama 3.1 8B Instruct Correlation Metrics |             |          |               | Llama 3.1 70B Instruct Correlation Metrics |             |          |               |
|-------------------------------------------|-------------|----------|---------------|--------------------------------------------|-------------|----------|---------------|
| Dataset                                   | Metric Type |          |               | Dataset                                    | Metric Type |          |               |
|                                           | Pearson     | Spearman | Kendall’s Tau |                                            | Pearson     | Spearman | Kendall’s Tau |
| MATH 500                                  | -0.676      | -0.745   | -0.565        | MATH 500                                   | -0.631      | -0.842   | -0.709        |
| GPQA                                      | -0.312      | -0.117   | -0.096        | GPQA                                       | -0.148      | -0.093   | -0.089        |
| MMLU College                              | -0.595      | -0.700   | -0.591        | MMLU College                               | -0.551      | -0.862   | -0.769        |
| MMLU Pro                                  | -0.590      | -0.555   | -0.425        | MMLU Pro                                   | -0.446      | -0.693   | -0.585        |
| BBH                                       | -0.365      | -0.386   | -0.300        | BBH                                        | -0.268      | -0.594   | -0.474        |

Table 9: **Performance of WEAVER with Different Clusters Counts**

| Clusters for WEAVER Dataset |               |             |             |             |             |
|-----------------------------|---------------|-------------|-------------|-------------|-------------|
| Dataset                     | Cluster Count |             |             |             |             |
|                             | 1             | 2           | 3           | 4           | 5           |
| MATH 500                    | <b>93.4</b>   | 87.6        | 83.8        | 82.8        | 81.2        |
| GPQA                        | <b>66.4</b>   | <b>66.4</b> | <b>66.4</b> | <b>66.4</b> | <b>66.4</b> |
| MMLU College                | <b>94.9</b>   | 91.7        | 90.1        | 89.6        | 89.8        |
| MMLU Pro                    | 88.4          | <b>90.2</b> | 87.1        | 84.6        | 79.8        |
| <b>Average</b>              | <b>85.8</b>   | 84.0        | 81.9        | 80.9        | 79.3        |

## C Experiments

### C.1 Models and Datasets

**Benchmarks:** We evaluate our models with several benchmarks for instruction-following, reasoning, mathematics, and coding: MATH500 [28], GPQA [62], MMLU [28], MMLU-Pro [82], and BBH [74]. We provide an overview of each dataset in Table 10. For MMLU, we selected the college-level questions for evaluation: biology, chemistry, physics, mathematics, computer science, and medicine. For MMLU Pro, we take a random sample of 500 queries out of the 12K queries available. For BBH, we take four tasks from the dataset of 6K queries available: Penguins in a Table, Causal Judgement, Logical Deduction (Five Objects), and Tracking Shuffled Objects (Five Objects).

**Models:** We evaluate candidate generations using a range of *weak verifiers*—models with imperfect but better-than-random accuracy. Our verification system  $\mathcal{V}$  includes two primary classes of weak verifiers: *Reward Models* and *LM Judges*.



- 1062 • **Reward Models:** A *reward model* (RM) is a trained language model that assigns a scalar  
1063 score to candidate responses based on how well they align with human preferences [39, 71].  
1064 Given a query and a candidate response, the RM outputs a value  $V_{ij} \in [0,1]$  representing the  
1065 estimated quality of candidate  $j$  according to criteria such as correctness, helpfulness, and  
1066 safety.
- 1067 – Examples of reward models include those from the RewardBench leaderboard [39], such  
1068 as INF-ORM [49], QRM Gemma [17], and Skywork Reward [44]. We also include  
1069 *process reward models* (PRMs), which score the reasoning process itself—emphasizing  
1070 step-by-step logic and coherence—rather than just the final answer [15, 90].
- 1071 – For our study, we selected the top-20 reward models from RewardBench and the top-20  
1072 process reward models from Process Reward Bench [71] at both 8B and 70B parameter  
1073 scales. We exclude any RM or PRM that fails to provide a positive learning signal—i.e.,  
1074 those whose rankings perform no better than random selection on benchmark train sets  
1075 (Appendix C.1). The diverse training objectives and datasets used for these reward  
1076 models introduce systematic biases that affect their verification capabilities [39, 71],  
1077 with different loss functions—including Bradley-Terry loss for pairwise preferences  
1078 [4], margin loss for fixed score differences [63], and pairwise ranking loss for relative  
1079 ordering [6].
- 1080 – Previous work has noted that it is nontrivial to combine the outputs of reward models  
1081 and judges as they provide logits and binary decision rules [76, 88]. Instead, we find that  
1082 we can normalize all RM scores to the range  $[0,1]$  using robust percentiles: the bottom  
1083 5th percentile is mapped to 0 and the top 95th percentile to 1. For models that provide  
1084 multiple scoring dimensions (e.g., ArmoRM [79]), we use only their primary output. For  
1085 our study, we selected the top-20 reward models from RewardBench [39].
- 1086 • **LM Judges:** An *LM judge* is a language model used to assess the correctness of a candidate  
1087 response by generating a binary verdict:  $V_{ij} \in \{0,1\}$ , where 1 indicates that the response is  
1088 judged correct. These models typically apply chain-of-thought (CoT) reasoning to arrive at  
1089 their decisions [86]. Each LM judge takes a query and a response as input and outputs a single  
1090 binary verdict.
- 1091 – We use well-known chat models from ChatBotArena [13] as LM judges, which are  
1092 known for their general-purpose reasoning capabilities. To ensure consistency and  
1093 determinism, we use greedy decoding (temperature  $T=0$ ) when generating judgments.

Table 10: **Benchmark Overview:** Evaluation configurations for AlpacaEval 2.0, Arena-Hard-Auto, AIMO, MATH500, GPQA, MMLU, MMLU Pro, and Big-Bench Hard (BBH).

| Benchmark    | Dataset Size | Scoring Type | Metric | License    |
|--------------|--------------|--------------|--------|------------|
| MATH500      | 500          | Ground Truth | Pass@1 | Apache 2.0 |
| GPQA         | 646          | Ground Truth | Pass@1 | CC BY 4.0  |
| MMLU College | 719          | Ground Truth | Pass@1 | MIT        |
| MMLU Pro     | 500          | Ground Truth | Pass@1 | MIT        |

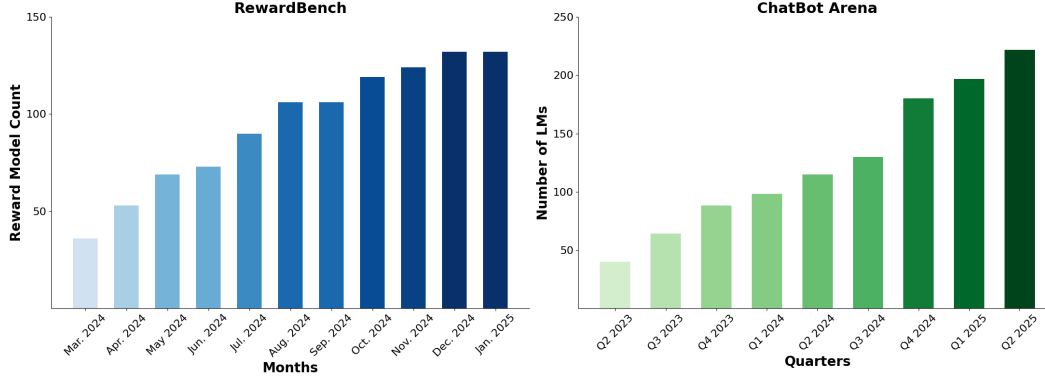

Figure 7: **Growth of Open-Source RMs and LMs:** As more and more RMs and LM judges become available, the need for better selection and utilization strategies for these models at test-time continues to grow.

Table 11: **Distribution of Generation Accuracy across Datasets for Llama 3.1 8B Instruct Model**

| Llama 3.1 8B Instruct                         |                             |         |         |         |         |         |         |         |         |         |           |
|-----------------------------------------------|-----------------------------|---------|---------|---------|---------|---------|---------|---------|---------|---------|-----------|
| Distribution of Positive/Negative Generations |                             |         |         |         |         |         |         |         |         |         |           |
| Dataset                                       | Percentage of Total Dataset |         |         |         |         |         |         |         |         |         | P/N Ratio |
|                                               | 0.0-0.1                     | 0.1-0.2 | 0.2-0.3 | 0.3-0.4 | 0.4-0.5 | 0.5-0.6 | 0.6-0.7 | 0.7-0.8 | 0.8-0.9 | 0.9-1.0 |           |
| AIMO                                          | 72.2%                       | 7.8%    | 3.3%    | 7.8%    | 2.2%    | 3.3%    | 2.2%    | 0.0%    | 1.1%    | 0.0%    | 10.3%     |
| MATH 500                                      | 12.2%                       | 11.4%   | 11.6%   | 8.2%    | 6.4%    | 8.0%    | 8.4%    | 6.60%   | 11.2%   | 15.0%   | 49.9%     |
| GPQA                                          | 28.5%                       | 21.2%   | 16.1%   | 7.4%    | 7.3%    | 5.3%    | 3.7%    | 3.3%    | 2.9%    | 2.6%    | 28.3%     |
| MMLU College                                  | 7.8%                        | 7.6%    | 7.1%    | 6.5%    | 6.7%    | 5.3%    | 7.2%    | 6.3%    | 8.6%    | 22.9%   | 64.1%     |
| MMLU Pro                                      | 22.4%                       | 9.8%    | 10.6%   | 5.4%    | 6.4%    | 7.2%    | 4.0%    | 7.6%    | 7.6%    | 15.2%   | 46.6%     |
| BBH                                           | 3.2%                        | 6.7%    | 10.3%   | 8.3%    | 10.3%   | 14.8%   | 11.6%   | 10.7%   | 10.4%   | 12.1%   | 56.9%     |

Table 12: **Distribution of Generation Accuracy across Datasets for Llama 3.1 70B Instruct Model**

| Llama 3.1 70B Instruct                        |                             |         |         |         |         |         |         |         |         |         |           |
|-----------------------------------------------|-----------------------------|---------|---------|---------|---------|---------|---------|---------|---------|---------|-----------|
| Distribution of Positive/Negative Generations |                             |         |         |         |         |         |         |         |         |         |           |
| Dataset                                       | Percentage of Total Dataset |         |         |         |         |         |         |         |         |         | P/N Ratio |
|                                               | 0.0-0.1                     | 0.1-0.2 | 0.2-0.3 | 0.3-0.4 | 0.4-0.5 | 0.5-0.6 | 0.6-0.7 | 0.7-0.8 | 0.8-0.9 | 0.9-1.0 |           |
| MATH 500                                      | 7.0%                        | 4.2%    | 3.8%    | 2.0%    | 2.2%    | 3.8%    | 4.2%    | 4.0%    | 7.8%    | 61.0%   | 78.0%     |
| GPQA                                          | 36.8%                       | 5.6%    | 5.1%    | 3.7%    | 6.2%    | 4.3%    | 4.5%    | 4.8%    | 8.0%    | 20.9%   | 42.9%     |
| MMLU College                                  | 8.1%                        | 3.2%    | 1.8%    | 2.2%    | 1.5%    | 1.7%    | 1.8%    | 3.2%    | 2.4%    | 74.1%   | 82.6%     |
| MMLU Pro                                      | 16.4%                       | 4.2%    | 1.8%    | 3.4%    | 3.0%    | 3.0%    | 3.2%    | 4.8%    | 6.0%    | 54.2%   | 69.9%     |

Table 14: WEAVER Verifier Accuracies and Covariances

| Approach                | Model Size | Benchmarks |        |          |         |
|-------------------------|------------|------------|--------|----------|---------|
|                         |            | MATH500    | GPQA   | MMLU Pro | Average |
| Verifier Accuracy Range | 70B        | 32.3%      | 43.6%  | 36.7%    | 37.5%   |
| Verifier Covariance     | 70B        | 0.0284     | 0.0341 | 0.0342   | 0.0322  |
| Verifier Accuracy Range | 8B         | 25.6%      | 31.4%  | 32.1%    | 29.7%   |
| Verifier Covariance     | 8B         | 0.0199     | 0.0337 | 0.0240   | 0.0259  |

Table 13: Models Tested for WEAVER.

|                    | Model                                        | Source Code | Parameter Count | License               | Loss Function             |
|--------------------|----------------------------------------------|-------------|-----------------|-----------------------|---------------------------|
| LM Judges          | Llama-3.1-70B-Instruct                       | Open-Source | 70B             | Llama 3.1 Community   | Cross-Entropy Loss        |
|                    | Llama-3.1-405B-Instruct                      | Open-Source | 405B            | Llama 3.1 Community   | Cross-Entropy Loss        |
|                    | Llama-3.3-70B-Instruct                       | Open-Source | 70B             | Llama 3.1 Community   | Cross-Entropy Loss        |
|                    | Meta-Llama-3.1-405B-Instruct-quantized.w8a16 | Open-Source | 405B            | Llama 3.1 Community   | Cross-Entropy Loss        |
|                    | DeepSeek LLM 67B Chat                        | Open-Source | 67B             | DeepSeek License      | Cross-Entropy Loss        |
|                    | DeepSeekLlama70B                             | Open-Source | 70B             | DeepSeek License      | Cross-Entropy Loss        |
|                    | DeepSeekQwen32B                              | Open-Source | 32B             | DeepSeek License      | Cross-Entropy Loss        |
|                    | DeepSeekLlama8B                              | Open-Source | 8B              | DeepSeek License      | Cross-Entropy Loss        |
|                    | DeepSeekQwen7B                               | Open-Source | 7B              | DeepSeek License      | Cross-Entropy Loss        |
|                    | Qwen2 72B Instruct                           | Open-Source | 72B             | Tongyi Qianwen        | Cross-Entropy Loss        |
|                    | Qwen2.5-72B-Instruct                         | Open-Source | 72B             | Tongyi Qianwen        | Cross-Entropy Loss        |
|                    | Qwen/Qwen2.5-72B-Instruct                    | Open-Source | 72B             | Tongyi Qianwen        | Cross-Entropy Loss        |
|                    | QwQ-32B                                      | Open-Source | 32B             | Apache 2.0            | Cross-Entropy Loss        |
|                    | Qwen1.5 110B Chat                            | Open-Source | 110B            | Tongyi Qianwen        | Cross-Entropy Loss        |
|                    | Qwen1.5 72B Chat                             | Open-Source | 72B             | Tongyi Qianwen        | Cross-Entropy Loss        |
|                    | Qwen-2.5-7B-Instruct                         | Open-Source | 7B              | Tongyi Qianwen        | Cross-Entropy Loss        |
|                    | Qwen-2.5-Math-7B-Instruct                    | Open-Source | 7B              | Tongyi Qianwen        | Cross-Entropy Loss        |
|                    | Mixtral 8x22B v0.1                           | Open-Source | 176B            | Apache 2.0            | Cross-Entropy Loss        |
|                    | Mixtral-8x22B-Instruct-v0.1                  | Open-Source | 176B            | Apache 2.0            | Cross-Entropy Loss        |
|                    | WizardLM 8x22B                               | Open-Source | 176B            | Apache 2.0            | Cross-Entropy Loss        |
|                    | WizardLM-2-8x22B                             | Open-Source | 176B            | Apache 2.0            | Cross-Entropy Loss        |
|                    | dbxr-instruct                                | Open-Source | 132B            | Databricks Open Model | Cross-Entropy Loss        |
|                    | SkyT1                                        | Open-Source | 32B             | Apache 2.0            | Cross-Entropy Loss        |
| RMs (8B and below) | GRM-Llama3-8B-rewardmodel-ft                 | Open-Source | 8B              | MIT                   | Pairwise Ranking Loss     |
|                    | GRM-Llama3.2-3B-rewardmodel-ft               | Open-Source | 3B              | Apache 2.0            | Pairwise Ranking Loss     |
|                    | GRM-Gemma2-2B-rewardmodel-ft                 | Open-Source | 2B              | Apache 2.0            | Pairwise Ranking Loss     |
|                    | Skywork-Reward-Llama-3.1-8B-v0.2             | Open-Source | 8B              | Skywork License       | Pairwise Ranking Loss     |
|                    | QRM-Llama3.1-8B-v2                           | Open-Source | 8B              | MIT                   | Quantile Regression Loss  |
|                    | URM-LLaMa-3.1-8B                             | Open-Source | 8B              | Skywork License       | Uncertainty-Aware Loss    |
|                    | GPM-Llama-3.1-8B                             | Open-Source | 8B              | MIT                   | Pairwise Ranking Loss     |
|                    | Llama-3-OffsetBias-RM-8B                     | Open-Source | 8B              | Llama 3.1 Community   | Pairwise Ranking Loss     |
|                    | ArmoRM-Llama3-8B-v0.1                        | Open-Source | 8B              | Llama 3.1 Community   | Pairwise Ranking Loss     |
|                    | Qwen2.5-Math-PRM-7B                          | Open-Source | 7B              | Tongyi Qianwen        | Cross-Entropy Loss        |
|                    | EurusPRM-Stage1                              | Open-Source | 7B              | Apache 2.0            | Cross-Entropy Loss        |
|                    | EurusPRM-Stage2                              | Open-Source | 7B              | Apache 2.0            | Cross-Entropy Loss        |
|                    | internlm2-7b-reward                          | Open-Source | 7B              | Apache 2.0            | Pairwise Ranking Loss     |
|                    | Decision-Tree-Reward-Llama-3.1-8B            | Open-Source | 8B              | Skywork License       | Decision Tree Loss        |
| RMs (27B-72B)      | Skywork-Reward-Gemma-2-27B-v0.2              | Open-Source | 27B             | Skywork License       | Pairwise Ranking Loss     |
|                    | QRM-Gemma-2-27B                              | Open-Source | 27B             | MIT                   | Quantile Regression Loss  |
|                    | INF-ORM-Llama3.1-70B                         | Open-Source | 70B             | Custom License        | Binary Cross-Entropy Loss |
|                    | Qwen2.5-Math-RM-72B                          | Open-Source | 72B             | Tongyi Qianwen        | Cross-Entropy Loss        |
|                    | Qwen2.5-Math-PRM-72B                         | Open-Source | 72B             | Tongyi Qianwen        | Cross-Entropy Loss        |
|                    | internlm2-20b-reward                         | Open-Source | 20B             | Apache 2.0            | Pairwise Ranking Loss     |
|                    | Decision-Tree-Reward-Gemma-2-27B             | Open-Source | 27B             | Skywork License       | Pairwise Ranking Loss     |

## 1094 C.2 Verification Baselines

### 1095 C.2.1 Verifier-Free Approaches

1096 **First Sample (Pass@1):** This baseline uses only the first generated response without any verification or  
 1097 selection mechanism. It represents the standard approach where models generate a single response and  
 1098 provides a lower bound for performance comparison. This method does not scale test-time compute or  
 1099 employ verification.

1100 **Majority Voting:** A verifier-free approach that generates multiple candidate responses and selects the  
 1101 most frequent final answer across all responses [5, 11, 70]. This method leverages repeated sampling  
 1102 but does not use verification models to assess response quality. Instead, it relies on the assumption that  
 1103 correct answers will appear more frequently than incorrect ones across multiple generations.

## 1104 C.2.2 Alternative Verification Strategies

1105 **Naive Unweighted Aggregation:** We consider three oracle configurations using the top-1, top-5,  
 1106 and top-10 verifiers (ranked by their agreement with ground-truth labels). Across all datasets, these  
 1107 oracle ensembles substantially outperform baselines. On average, the best-performing unweighted  
 1108 ensembles exceed first-sample performance by 20.3% and outperform majority voting by 15.0%  
 1109 (see Figure 2). For more difficult benchmarks such as GPQA and MMLU-Pro, the top-5 and top-10  
 1110 ensembles consistently outperform top-1, suggesting that verifier diversity is especially beneficial on  
 1111 challenging examples. However, these oracle ensembles rely on access to ground truth to rank verifiers,  
 1112 limiting their use in practice and motivating the need for learned, unsupervised weighting.

1113 **Naive Bayes:** We implement a Naive Bayes classifier that models the probability of response correctness  
 1114 given verifier scores:  $P(y_{ij} = 1 | s_{ij1}, \dots, s_{ijm}) = \frac{P(s_{ij1}, \dots, s_{ijm} | y_{ij} = 1)P(y_{ij} = 1)}{P(s_{ij1}, \dots, s_{ijm})}$ . Under the conditional  
 1115 independence assumption, this factorizes as  $P(s_{ij1}, \dots, s_{ijm} | y_{ij} = 1) = \prod_{k=1}^m P(s_{ijk} | y_{ij} = 1)$ .  
 1116 We estimate the parameters using labeled data from the development set. This approach provides  
 1117 a probabilistic framework for aggregating verifier outputs but requires labeled data for parameter  
 1118 estimation.

1119 **Logistic Regression:** We train a logistic regression classifier where the input features are the verifier  
 1120 scores  $[s_{ij1}, \dots, s_{ijm}]$  and the output is the correctness of each response:  $P(y_{ij} = 1 | s_{ij}) = \sigma(\mathbf{w}^T s_{ij} + b)$ ,  
 1121 where  $\sigma$  is the sigmoid function. The weights  $\mathbf{w}$  and bias  $b$  are learned using labeled training data.  
 1122 This supervised approach can capture more complex relationships between verifier outputs than naive  
 1123 averaging but requires substantial labeled data for effective training.

1124 **Multi-Agent Verification (MAV) [41]:** This approach combines multiple "Aspect Verifiers" (AVs) -  
 1125 off-the-shelf LLMs prompted to verify specific aspects of candidate outputs through binary True/False  
 1126 approvals. Unlike reward models, AVs require no additional training and can be easily combined  
 1127 through voting mechanisms. The MAV framework uses BoN-MAV (Best-of-N with Multi-Agent  
 1128 Verification), which: (1) samples  $n$  candidate outputs from a generator LLM, (2) collects binary  
 1129 approvals from multiple aspect verifiers that vary across three dimensions (base LLM, aspect to verify,  
 1130 and verification strategy), and (3) selects the output with the most approvals. In our implementation, we  
 1131 use Llama 3.3 70B Instruct as the judge model rather than Gemini 1.5 Flash/Pro as used in the original  
 1132 paper.

1133 **Self-Verification [93]:** This method implements a sophisticated sampling-based search approach  
 1134 where models verify their own responses through detailed natural language analysis. The approach  
 1135 goes beyond simple self-critique by using structured verification prompts that: (1) rewrite candidate  
 1136 responses in rigorous mathematical theorem-lemma-proof format, (2) systematically scan for errors  
 1137 through step-by-step analysis, and (3) compare responses to localize potential mistakes. The method  
 1138 leverages two key principles: comparing across responses provides signals about error locations (since  
 1139 models struggle with error recall but can identify errors when given their locations), and different output  
 1140 styles are optimal for different tasks (chain-of-thought for generation, rigorous mathematical format  
 1141 for verification). This approach differs from naive self-verification by using structured, multi-step  
 1142 verification protocols rather than simple correctness judgments.

Table 15: **Logistic Regression and Naive Bayes Performances across Datasets and Dev Set Sizes**

| Dataset      | Approach            | Model Size | Dev Set Size |       |       |       |       |
|--------------|---------------------|------------|--------------|-------|-------|-------|-------|
|              |                     |            | 0.01         | 0.05  | 0.2   | 0.5   | 1.0   |
| MATH-500     | Logistic Regression | 70B        | 70.5%        | 74.7% | 81.4% | 93.1% | 97.2% |
|              | Naive Bayes         | 70B        | 67.4%        | 78.1% | 85.0% | 89.2% | 92.2% |
| GPQA Diamond | Logistic Regression | 70B        | 55.9%        | 59.4% | 69.8% | 71.4% | 72.9% |
|              | Naive Bayes         | 70B        | 47.2%        | 49.2% | 57.6% | 62.1% | 64.3% |
| MMLU Pro     | Logistic Regression | 70B        | 72.1%        | 81.0% | 84.6% | 86.0% | 92.0% |
|              | Naive Bayes         | 70B        | 60.2%        | 73.1% | 73.1% | 78.6% | 78.6% |

### 1143 C.3 Scaling Trends of WEAVER

1144 Scaling laws describe how performance metrics such as accuracy, sample efficiency or compute cost  
 1145 change as we scale controllable resources, i.e. the number of trials  $K$ , model capacity. [33] showed that,  
 1146 for fixed-parameter Transformer language models, the cross-entropy loss decreases as a power-law  
 1147 in both model size and data. This framework has since been extended to explore optimal tradeoffs  
 1148 between model and data scaling [30], as well as inference-time scaling with multiple samples [5, 12].

1149 First, we establish the power law scaling of the Pass@K rate. Assume the  $i$ -th problem has an unknown  
 1150 “difficulty”  $p_i \in [0, 1]$ , the probability that one response is correct. With  $K$  independent samples, the  
 1151 chance we get at least one correct response is

$$q_i(p_i, K) = 1 - (1 - p_i)^K \approx 1 - \exp(-p_i \cdot K) \quad \text{for small } p_i$$

1152 Define the indicator variable:

$$X_i = \begin{cases} 1, & \text{if the } i\text{-th query is solved at least once (with probability } q_i), \\ 0, & \text{otherwise,} \end{cases}$$

1153 and let the total number of solved problems be  $Y = \sum_{i=1}^N X_i$ .

1154 The expected coverage (Pass@K) is the expected fraction of problems solved after trying  $K$  times per  
 1155 problem:

$$\text{Pass@K} := \mathbb{E}[Y]/N = \frac{1}{N} \sum_{i=1}^N (1 - (1 - p_i)^K)$$

1156 To model population-level variation in problem difficulty, we assume each problem’s correctness  
 1157 probability  $p_i$  is drawn from a Beta distribution:  $p_i \sim \text{Beta}(\alpha, \beta)$ . This captures the idea that some  
 1158 problems are easier (high  $p_i$ ) while others are harder (low  $p_i$ ), with the overall distribution controlled  
 1159 by the shape parameters  $\alpha, \beta$ . Then, the fraction of problem that can be solved in  $K$  attempts follows,

$$\begin{aligned} \text{Pass@K} &= \mathbb{E}_{p \sim \text{Beta}(\alpha, \beta)} [1 - (1 - p)^K] \\ &= 1 - \mathbb{E}_{p \sim \text{Beta}(\alpha, \beta)} [(1 - p)^K] = 1 - \frac{B(\alpha, \beta + K)}{B(\alpha, \beta)} \end{aligned} \quad (11)$$

1160 by the definition of the Beta function  $B(\cdot, \cdot)$ . Taking logarithm:

$$\log \text{Pass@K} = \log \left( 1 - \frac{B(\alpha, \beta + K)}{B(\alpha, \beta)} \right) \approx - \frac{B(\alpha, \beta + K)}{B(\alpha, \beta)}$$

1161 by  $\log(1 - x) \approx -x$  when  $x$  is small, which holds for large  $K$ . Then, expressing the Beta function in  
 1162 terms of the Gamma function leads to:

$$\log \text{Pass@K} \approx - \frac{\Gamma(\beta + K) \Gamma(\alpha + \beta)}{\Gamma(\beta) \Gamma(\alpha + \beta + K)}$$

1163 For large  $K$ , we can apply Stirling's approximation of the Gamma function  $\log \Gamma(x) \approx x \log x - x +$   
 1164  $\frac{1}{2} \log(2\pi) + \frac{1}{2} \log x$ :

$$\begin{aligned} \log[-\log \text{Pass@K}] &= \log \Gamma(\beta + K) + \log \Gamma(\alpha + \beta) - \log \Gamma(\beta) - \log \Gamma(\alpha + \beta + K) \\ &\approx (\beta + K) \log(\beta + K) - (\alpha + \beta + K) \log(\alpha + \beta + K) + \frac{1}{2} \log \left( \frac{\beta + K}{\alpha + \beta + K} \right) \\ &\approx (\beta + K) \log K - (\alpha + \beta + K) \log K + \text{const} \\ &= -\alpha \log K + \log \zeta \end{aligned}$$

1165 when we retain the leading term. In turn, the log of the expected coverage follows a power law in  $K$ ,  
 1166 scaling as:

$$\log \text{Pass@K} = -\exp(-\alpha \log K + \log \zeta) = -\zeta K^{-\alpha} \quad (12)$$

1167 **Verifier Success Modeling** Now suppose we pass the  $K$  candidates through a scoring model  
 1168 ("verifier") which selects the top-scoring answer. The verification process succeeds if (i) at least one  
 1169 correct answer was generated and (ii) the verifier ranks a correct answer highest.

$$\text{Selection@1}(K) := \mathbb{P}[\text{top-scoring response is correct}] \quad (13)$$

1170 Assume the verifier assigns scores such that correct responses are drawn from a score distribution  $f_1$ ,  
 1171 and the incorrect responses from a distribution  $f_0$ . Let  $s^{(1)} = \{s_j : y_j = 1\}$  and  $s^{(0)} = \{s_j : y_j = 0\}$   
 1172 denote the scores of correct and incorrect responses, respectively. Then a query is successfully verified  
 1173 if:

$$\text{Selection@1} = \mathbb{P}[\max s^{(1)} > \max s^{(0)}]$$

1174 Our goal is to compute the probability that the maximum of  $c$  i.i.d draws from  $f_1$  exceeds the maximum  
 1175 of  $K - c$  draws from  $f_0$ .

1176 To model the correctness of responses, we assume each query  $i$  has a latent correctness probability  
 1177  $p_i \sim \text{Beta}(\alpha, \beta)$ , reflecting query-specific difficulty. Given  $p_i$ , each of the  $K$  responses is sampled  
 1178 independently as:

$$y_{ij} \sim \text{Bernoulli}(p_i), \quad j = 1, \dots, K$$

1179 This implies the number of correct responses follows a Binomial distribution:

$$C_i = \sum_{j=1}^K y_{ij} \sim \text{Binomial}(K, p_i)$$

1180 assuming (1) conditional independence of responses given  $p_i$ , (2) identical correctness probabilities  
 1181 within a query, and (3) a fixed number of responses  $K$ .

1182 Because the correctness probability  $p$  varies across queries, the dataset-level Selection@1 curve  
 1183 requires marginalizing over  $p$ :

$$\text{Selection@1}(K) = \mathbb{E}_{p \sim \text{Beta}(\alpha, \beta)}[\text{Selection@1}(K | p)]$$

1184 Combined with the need to model max comparisons over verifier scores, it renders the exact calculation  
 1185 of Selection@1 analytically intractable.

1186 To enable tractable, smooth modeling of Selection@1, we introduce the following parametric form:

$$\text{Selection@1}(K) \approx \exp(-\zeta K^{-\alpha}) \cdot (1 - (1 - \pi)^{K^\gamma}) \quad (14)$$

- 1187 • The **coverage term**  $\exp(-\zeta K^{-\alpha})$  approximates the probability that at least one correct  
 1188 response is generated.
- 1189 • The **verification term**  $1 - (1 - \pi)^{K^\gamma}$  approximates the chance that the top-scoring response is  
 1190 correct, given that at least one correct response exists. The parameter  $\gamma$  controls whether veri-  
 1191 fier performance improves sublinearly or superlinearly with  $K$ . The parameter  $\pi$  represents  
 1192 the effective per-response probability that a correct response is successfully selected by the  
 1193 verifier, conditioned on the response being correct and included in the candidate set.



To obtain practical scaling trends, we fit parametric models in Eq. (14) to the empirical averages computed from 5 independent runs for each value of  $K$ , across each dataset and verification strategy. Specifically, we use the L-BFGS-B algorithm to optimize a smooth approximation following [29]. To ensure numerical stability and robustness to outliers or heavy-tailed noise in the observed selection accuracies, we minimize the Huber loss between the predicted values and the empirical means. The Huber loss behaves quadratically for small residuals and linearly for large ones, making it less sensitive to outliers than mean squared error (MSE) while maintaining smooth differentiability for gradient-based optimization. It is defined as,

$$L_\delta(r) = \begin{cases} \frac{1}{2}r^2 & \text{if } |r| \leq \delta \\ \delta(|r| - \frac{1}{2}\delta) & \text{otherwise} \end{cases}$$

where  $\delta > 0$  is a tunable threshold that controls the transition between the two regimes. We search over  $\delta \in \{0.01, 0.05, 0.1, 0.25, 0.5\}$  to select the value that yields the best fit.

Additionally, we introduce floor and ceiling parameters to bound the predicted values and model saturation behavior. The floor accounts for the irreducible failure rate even at high  $K$ , while the ceiling models the upper bound on achievable performance (e.g., due to imperfect verifiers or ambiguous problems). The final fitted form is:

$$\text{Selection@1}(K) \approx \text{floor} + (\text{ceil} - \text{floor}) \cdot \exp(-\zeta K^{-\alpha}) \cdot (1 - (1 - \pi)^{K^\gamma}) \quad (15)$$

We can use an unbiased estimator to evaluate best-of- $k$  selection accuracy when a fixed verifier is used to rank responses, as described in [69]. However, in the case of WEAVER, the development set constitutes 1% of the data and is itself selected based on the value of  $K$ . In turn, the ranking of responses is no longer independent of  $K$ , introducing bias into the best-of- $k$  estimate. As a result, we instead rely on Monte Carlo estimates to approximate best-of- $k$  performance, sampling  $k$  responses multiple times and computing the average accuracy of the top-ranked output under the  $K$ -dependent verifier. We use an unbiased estimator for coverage, as described in [12].

Fig. 8 and Fig. 9 along with Table 16 illustrate how the different verification strategies scale with the number of generations and match the trend in Eq. (14). Each method exhibits characteristic scaling behavior that aligns with the theoretical form in Eq. (14). WEAVER demonstrates improved performance over naive ensembles and majority voting. The fitted parameters in Table 16 quantitatively capture these trends across datasets, providing evidence that the parametric form in Eq. (15) closely model empirical outcomes. Fig. 10 and Fig. 11 along with Table 17 illustrate the predictive performance of the parametric form in Eq. (15), showing that models fit on subsets of  $K$  can extrapolate to unseen values of  $K$ .

Table 16: Fitted parameters for Scaling Trends in Fig. 8, Fig. 9,

| Dataset               | Approach       | Equation                                                                                                          | floor  | ceil   | $\alpha$ | $\beta$ | $\pi$  | $\gamma$ | R2 fit | MSE fit | $\delta$ |
|-----------------------|----------------|-------------------------------------------------------------------------------------------------------------------|--------|--------|----------|---------|--------|----------|--------|---------|----------|
| GPQA-v2-Diamond (70B) | Pass@K         | $y = \text{floor} + (\text{ceil} - \text{floor}) \cdot \exp(-\zeta \cdot K^{-\alpha})$                            | 0.0000 | 0.9429 | 0.7603   | 0.3475  | X      | X        | 0.9999 | 0.0000  | 0.5000   |
| GPQA-v2-Diamond (70B) | Weaver         | $y = \text{floor} + (\text{ceil} - \text{floor}) \cdot \exp(-\zeta \cdot K^{-\alpha}) (1 - (1 - \pi)^{K^\gamma})$ | 0.3958 | 0.6728 | 0.7320   | 1.5865  | 0.3250 | 0.5053   | 0.9994 | 0.0000  | 0.1000   |
| GPQA-v2-Diamond (70B) | Majority1@K    | $y = \text{floor} + (\text{ceil} - \text{floor}) \cdot \exp(-\zeta \cdot K^{-\alpha}) (1 - (1 - \pi)^{K^\gamma})$ | 0.4283 | 0.4710 | 0.0499   | 1.0000  | 0.1217 | 1.0091   | 0.8634 | 0.0000  | 0.0100   |
| GPQA-v2-Diamond (70B) | Naive Ensemble | $y = \text{floor} + (\text{ceil} - \text{floor}) \cdot \exp(-\zeta \cdot K^{-\alpha}) (1 - (1 - \pi)^{K^\gamma})$ | 0.3921 | 0.6071 | 0.6553   | 1.9147  | 0.4224 | 0.5000   | 0.9975 | 0.0000  | 0.2500   |
| MATH-500-v2 (70B)     | Pass@K         | $y = \text{floor} + (\text{ceil} - \text{floor}) \cdot \exp(-\zeta \cdot K^{-\alpha})$                            | 0.6262 | 1.0000 | 0.8394   | 0.6427  | X      | X        | 0.9994 | 0.0000  | 0.2500   |
| MATH-500-v2 (70B)     | Weaver         | $y = \text{floor} + (\text{ceil} - \text{floor}) \cdot \exp(-\zeta \cdot K^{-\alpha}) (1 - (1 - \pi)^{K^\gamma})$ | 0.7870 | 0.9371 | 3.3908   | 3.0000  | 0.2869 | 0.5000   | 0.9958 | 0.0000  | 0.1000   |
| MATH-500-v2 (70B)     | Majority1@K    | $y = \text{floor} + (\text{ceil} - \text{floor}) \cdot \exp(-\zeta \cdot K^{-\alpha}) (1 - (1 - \pi)^{K^\gamma})$ | 0.7747 | 0.8238 | 10.0000  | 2.1433  | 0.0885 | 2.4951   | 0.8655 | 0.0001  | 0.1000   |
| MATH-500-v2 (70B)     | Naive Ensemble | $y = \text{floor} + (\text{ceil} - \text{floor}) \cdot \exp(-\zeta \cdot K^{-\alpha}) (1 - (1 - \pi)^{K^\gamma})$ | 0.7883 | 0.9282 | 4.0033   | 3.0000  | 0.2573 | 0.5000   | 0.9961 | 0.0000  | 0.0100   |
| MMLU-Pro-v2 (70B)     | Pass@K         | $y = \text{floor} + (\text{ceil} - \text{floor}) \cdot \exp(-\zeta \cdot K^{-\alpha})$                            | 0.0000 | 0.9828 | 0.3303   | 0.3465  | X      | X        | 0.9967 | 0.0000  | 0.2500   |
| MMLU-Pro-v2 (70B)     | Weaver         | $y = \text{floor} + (\text{ceil} - \text{floor}) \cdot \exp(-\zeta \cdot K^{-\alpha}) (1 - (1 - \pi)^{K^\gamma})$ | 0.6912 | 0.9148 | 1.5284   | 3.0000  | 0.2764 | 0.5000   | 0.9987 | 0.0000  | 0.1000   |
| MMLU-Pro-v2 (70B)     | Majority1@K    | $y = \text{floor} + (\text{ceil} - \text{floor}) \cdot \exp(-\zeta \cdot K^{-\alpha}) (1 - (1 - \pi)^{K^\gamma})$ | 0.6933 | 0.7399 | 0.0498   | 1.0001  | 0.1531 | 1.0123   | 0.9451 | 0.0000  | 0.0100   |
| MMLU-Pro-v2 (70B)     | Naive Ensemble | $y = \text{floor} + (\text{ceil} - \text{floor}) \cdot \exp(-\zeta \cdot K^{-\alpha}) (1 - (1 - \pi)^{K^\gamma})$ | 0.6969 | 0.8874 | 1.7834   | 3.0000  | 0.2403 | 0.5000   | 0.9944 | 0.0000  | 0.2500   |
| MMLU-College-v2 (70B) | Pass@K         | $y = \text{floor} + (\text{ceil} - \text{floor}) \cdot \exp(-\zeta \cdot K^{-\alpha})$                            | 0.5924 | 0.9744 | 0.5071   | 0.5682  | X      | X        | 0.9982 | 0.0000  | 0.0100   |
| MMLU-College-v2 (70B) | Weaver         | $y = \text{floor} + (\text{ceil} - \text{floor}) \cdot \exp(-\zeta \cdot K^{-\alpha}) (1 - (1 - \pi)^{K^\gamma})$ | 0.8234 | 0.9477 | 4.4129   | 3.0000  | 0.3622 | 0.5000   | 0.9987 | 0.0000  | 0.0100   |
| MMLU-College-v2 (70B) | Majority1@K    | $y = \text{floor} + (\text{ceil} - \text{floor}) \cdot \exp(-\zeta \cdot K^{-\alpha}) (1 - (1 - \pi)^{K^\gamma})$ | 0.8197 | 0.8412 | 0.0498   | 1.0001  | 0.2057 | 1.0173   | 0.8912 | 0.0000  | 0.0100   |
| MMLU-College-v2 (70B) | Naive Ensemble | $y = \text{floor} + (\text{ceil} - \text{floor}) \cdot \exp(-\zeta \cdot K^{-\alpha}) (1 - (1 - \pi)^{K^\gamma})$ | 0.8235 | 0.9266 | 3.8766   | 3.0000  | 0.3012 | 0.5000   | 0.9925 | 0.0000  | 0.0500   |
| GPQA-v2-Diamond (8B)  | Pass@K         | $y = \text{floor} + (\text{ceil} - \text{floor}) \cdot \exp(-\zeta \cdot K^{-\alpha})$                            | 0.2262 | 0.9926 | 2.5454   | 0.8474  | X      | X        | 0.9996 | 0.0000  | 0.1000   |
| GPQA-v2-Diamond (8B)  | Weaver         | $y = \text{floor} + (\text{ceil} - \text{floor}) \cdot \exp(-\zeta \cdot K^{-\alpha}) (1 - (1 - \pi)^{K^\gamma})$ | 0.2463 | 0.4549 | 0.0534   | 1.0020  | 0.1953 | 0.7089   | 0.9948 | 0.0000  | 0.0500   |
| GPQA-v2-Diamond (8B)  | Majority1@K    | $y = \text{floor} + (\text{ceil} - \text{floor}) \cdot \exp(-\zeta \cdot K^{-\alpha}) (1 - (1 - \pi)^{K^\gamma})$ | 0.2783 | 0.3029 | 1.2431   | 0.6756  | 0.0630 | 2.5000   | 0.9929 | 0.0000  | 0.0500   |
| GPQA-v2-Diamond (8B)  | Naive Ensemble | $y = \text{floor} + (\text{ceil} - \text{floor}) \cdot \exp(-\zeta \cdot K^{-\alpha}) (1 - (1 - \pi)^{K^\gamma})$ | 0.2359 | 0.3727 | 0.0701   | 1.0016  | 0.3871 | 0.5000   | 0.9408 | 0.0001  | 0.0100   |
| MATH-500-v2 (8B)      | Pass@K         | $y = \text{floor} + (\text{ceil} - \text{floor}) \cdot \exp(-\zeta \cdot K^{-\alpha})$                            | 0.4099 | 1.0000 | 1.7182   | 0.8949  | X      | X        | 0.9976 | 0.0001  | 0.0100   |
| MATH-500-v2 (8B)      | Weaver         | $y = \text{floor} + (\text{ceil} - \text{floor}) \cdot \exp(-\zeta \cdot K^{-\alpha}) (1 - (1 - \pi)^{K^\gamma})$ | 0.4110 | 0.7440 | 0.0785   | 1.0033  | 0.3333 | 0.5036   | 0.9984 | 0.0000  | 0.0100   |
| MATH-500-v2 (8B)      | Majority1@K    | $y = \text{floor} + (\text{ceil} - \text{floor}) \cdot \exp(-\zeta \cdot K^{-\alpha}) (1 - (1 - \pi)^{K^\gamma})$ | 0.5058 | 0.7038 | 5.1187   | 1.0175  | 0.0666 | 2.5000   | 0.9964 | 0.0000  | 0.0500   |
| MMLU-Pro-v2 (8B)      | Naive Ensemble | $y = \text{floor} + (\text{ceil} - \text{floor}) \cdot \exp(-\zeta \cdot K^{-\alpha}) (1 - (1 - \pi)^{K^\gamma})$ | 0.5071 | 0.7508 | 1.8068   | 3.0000  | 0.2890 | 0.5000   | 0.9796 | 0.0001  | 0.0100   |
| MMLU-Pro-v2 (8B)      | Pass@K         | $y = \text{floor} + (\text{ceil} - \text{floor}) \cdot \exp(-\zeta \cdot K^{-\alpha})$                            | 0.3906 | 1.0000 | 1.9045   | 0.7590  | X      | X        | 0.9991 | 0.0000  | 0.0100   |
| MMLU-Pro-v2 (8B)      | Weaver         | $y = \text{floor} + (\text{ceil} - \text{floor}) \cdot \exp(-\zeta \cdot K^{-\alpha}) (1 - (1 - \pi)^{K^\gamma})$ | 0.4764 | 0.6846 | 2.7876   | 3.0000  | 0.2136 | 0.6141   | 0.9985 | 0.0000  | 0.2500   |
| MMLU-Pro-v2 (8B)      | Majority1@K    | $y = \text{floor} + (\text{ceil} - \text{floor}) \cdot \exp(-\zeta \cdot K^{-\alpha}) (1 - (1 - \pi)^{K^\gamma})$ | 0.4439 | 0.5662 | 0.1136   | 0.9916  | 0.2787 | 0.6659   | 0.9084 | 0.0001  | 0.0100   |
| MMLU-College-v2 (8B)  | Naive Ensemble | $y = \text{floor} + (\text{ceil} - \text{floor}) \cdot \exp(-\zeta \cdot K^{-\alpha}) (1 - (1 - \pi)^{K^\gamma})$ | 0.4771 | 0.7025 | 2.8863   | 3.0000  | 0.1728 | 0.5181   | 0.9986 | 0.0000  | 0.1000   |
| MMLU-College-v2 (8B)  | Pass@K         | $y = \text{floor} + (\text{ceil} - \text{floor}) \cdot \exp(-\zeta \cdot K^{-\alpha})$                            | 0.4316 | 0.9924 | 0.9887   | 0.9123  | X      | X        | 0.9994 | 0.0000  | 0.5000   |
| MMLU-College-v2 (8B)  | Weaver         | $y = \text{floor} + (\text{ceil} - \text{floor}) \cdot \exp(-\zeta \cdot K^{-\alpha}) (1 - (1 - \pi)^{K^\gamma})$ | 0.6226 | 0.8494 | 1.2646   | 3.0000  | 0.3346 | 0.5000   | 0.9958 | 0.0000  | 0.2500   |
| MMLU-College-v2 (8B)  | Majority1@K    | $y = \text{floor} + (\text{ceil} - \text{floor}) \cdot \exp(-\zeta \cdot K^{-\alpha}) (1 - (1 - \pi)^{K^\gamma})$ | 0.6359 | 0.7368 | 1.0929   | 0.5130  | 0.0576 | 2.5000   | 0.9949 | 0.0000  | 0.0500   |
| MMLU-College-v2 (8B)  | Naive Ensemble | $y = \text{floor} + (\text{ceil} - \text{floor}) \cdot \exp(-\zeta \cdot K^{-\alpha}) (1 - (1 - \pi)^{K^\gamma})$ | 0.6283 | 0.8085 | 1.4279   | 3.0000  | 0.3914 | 0.5000   | 0.9845 | 0.0000  | 0.0100   |

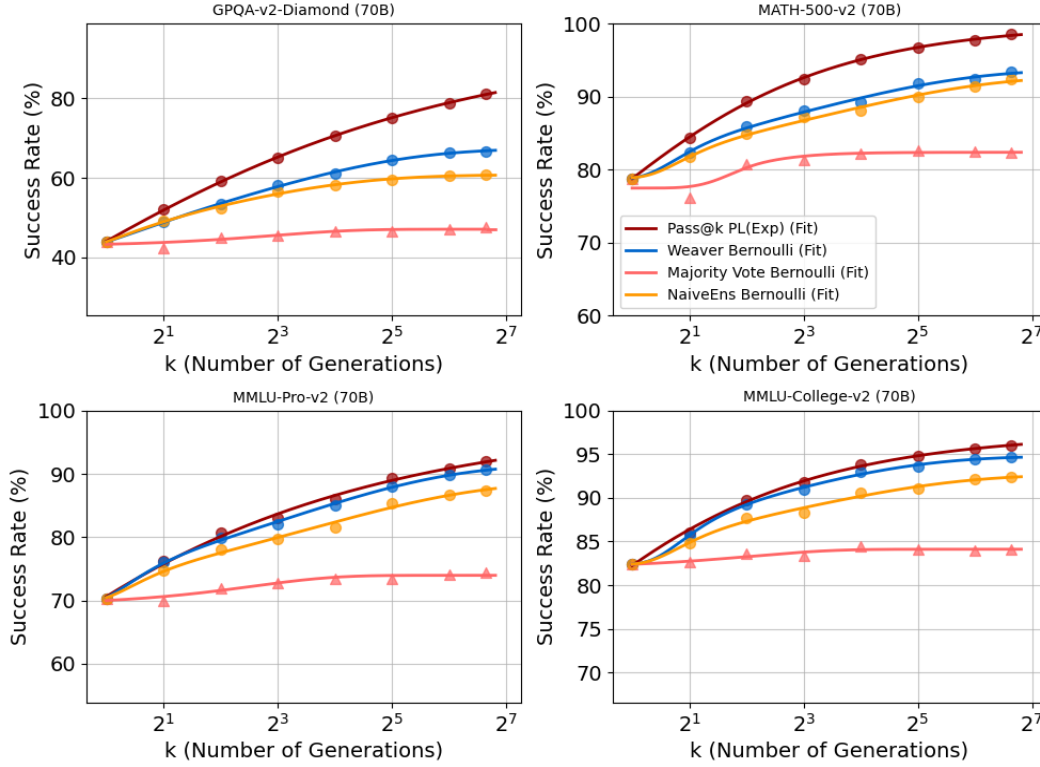

Figure 8: **WEAVER** Scaling trend fit for 70B models

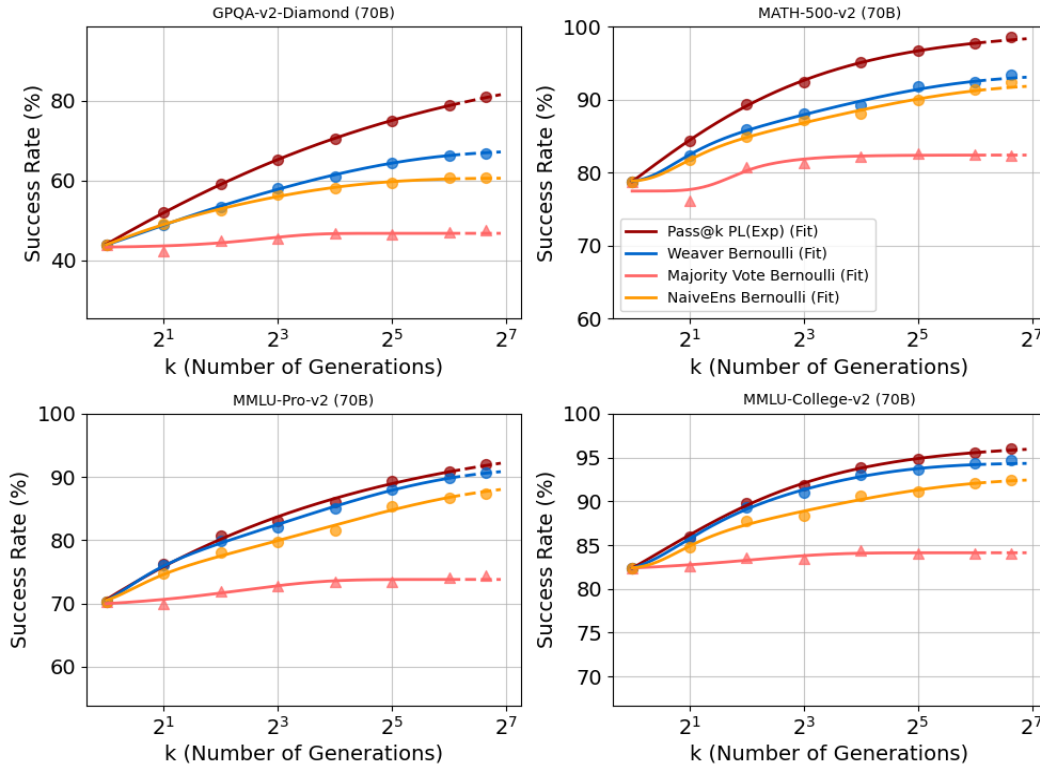

Figure 10: **WEAVER** Scaling trend predicted for 70B models

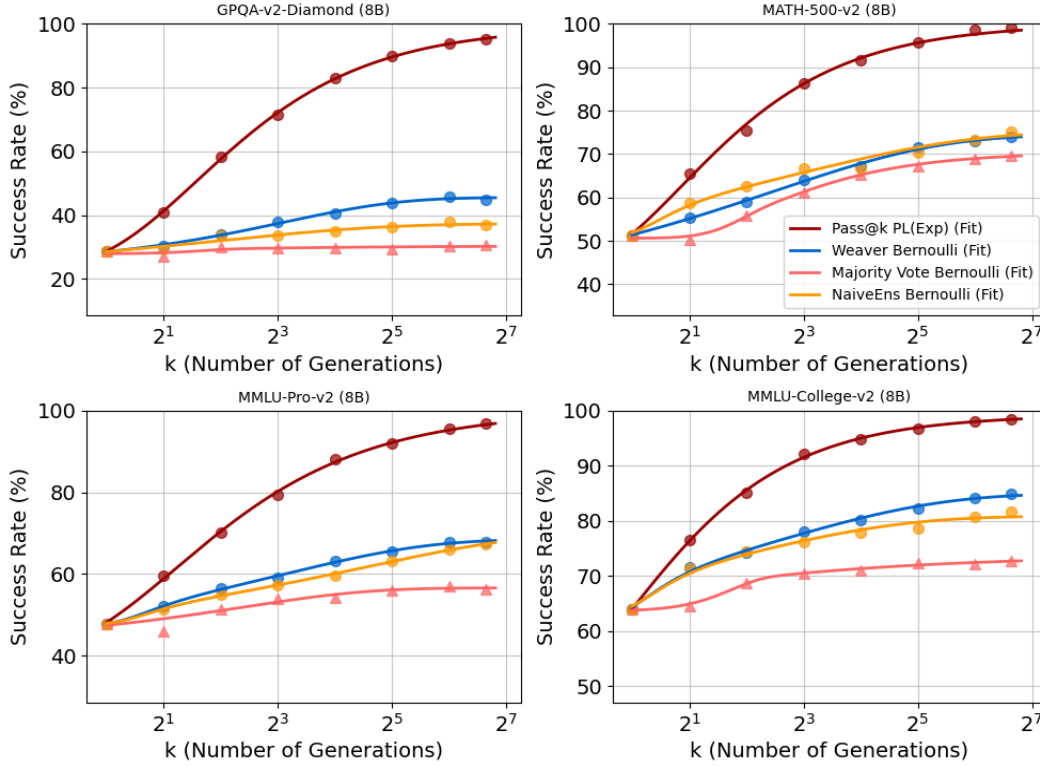

Figure 9: **WEAVER** Scaling trend fit for 8B models.

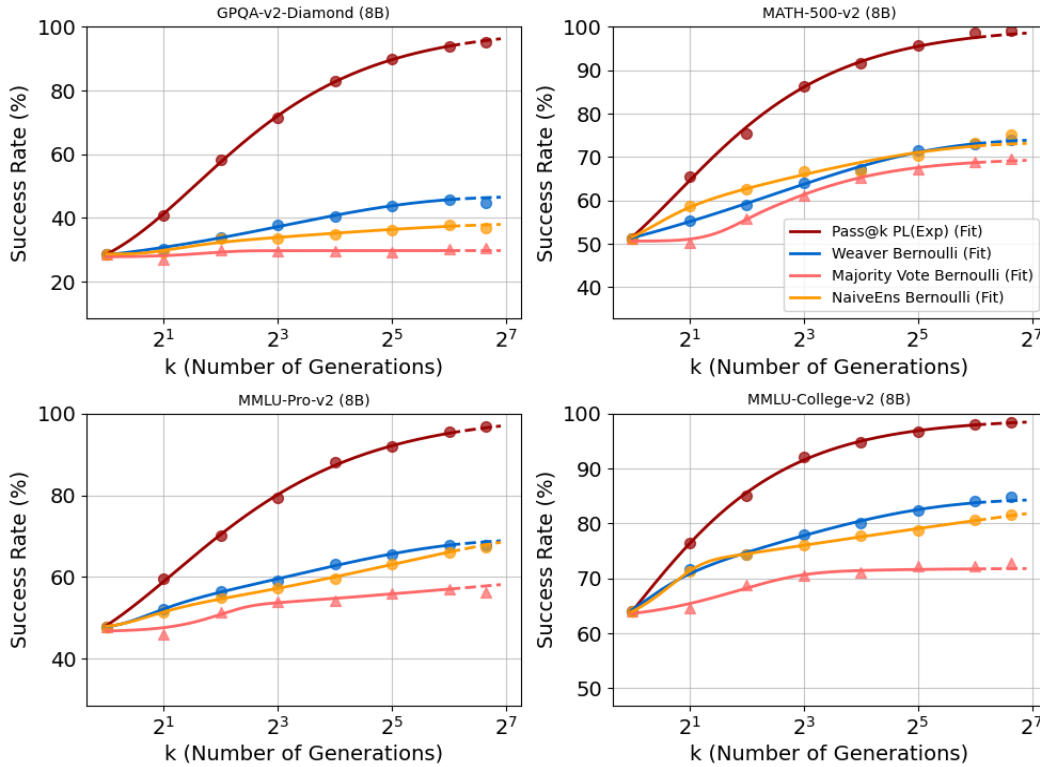

Figure 11: **WEAVER** Scaling trend predicted for 8B models

Table 17: Fitted parameters for Scaling Trends with 90% of data in Fig. 10 and Fig. 11.

| Dataset               | Approach       | Equation                                                                                                          | floor  | ceil   | $\alpha$ | $\beta$ | $\pi$  | $\gamma$ | R2 fit | MSE fit | MSE pred | $\delta$ |
|-----------------------|----------------|-------------------------------------------------------------------------------------------------------------------|--------|--------|----------|---------|--------|----------|--------|---------|----------|----------|
| GPQA-v2-Diamond (70B) | Pass@K         | $y = \text{floor} + (\text{ceil} - \text{floor}) \cdot \exp(-\zeta \cdot K^{-\alpha})$                            | 0.0000 | 0.9357 | 0.7534   | 0.3537  | X      | X        | 0.9999 | 0.0000  | 0.0000   | 0.1000   |
| GPQA-v2-Diamond (70B) | Weaver         | $y = \text{floor} + (\text{ceil} - \text{floor}) \cdot \exp(-\zeta \cdot K^{-\alpha}) (1 - (1 - \pi)^{K^\gamma})$ | 0.4050 | 0.6756 | 0.9195   | 1.6227  | 0.3163 | 0.5000   | 0.9993 | 0.0000  | 0.0000   | 0.0500   |
| GPQA-v2-Diamond (70B) | Majority1@K    | $y = \text{floor} + (\text{ceil} - \text{floor}) \cdot \exp(-\zeta \cdot K^{-\alpha}) (1 - (1 - \pi)^{K^\gamma})$ | 0.4320 | 0.4678 | 0.0707   | 0.9864  | 0.0414 | 1.6541   | 0.8601 | 0.0000  | 0.0001   | 0.0100   |
| GPQA-v2-Diamond (70B) | Naive Ensemble | $y = \text{floor} + (\text{ceil} - \text{floor}) \cdot \exp(-\zeta \cdot K^{-\alpha}) (1 - (1 - \pi)^{K^\gamma})$ | 0.3809 | 0.6061 | 0.5211   | 1.9075  | 0.4360 | 0.5000   | 0.9972 | 0.0000  | 0.0000   | 0.0500   |
| MATH-500-v2 (70B)     | Pass@K         | $y = \text{floor} + (\text{ceil} - \text{floor}) \cdot \exp(-\zeta \cdot K^{-\alpha})$                            | 0.6639 | 0.9952 | 0.9836   | 0.6936  | X      | X        | 0.9995 | 0.0000  | 0.0000   | 0.0100   |
| MATH-500-v2 (70B)     | Weaver         | $y = \text{floor} + (\text{ceil} - \text{floor}) \cdot \exp(-\zeta \cdot K^{-\alpha}) (1 - (1 - \pi)^{K^\gamma})$ | 0.7869 | 0.9339 | 3.5000   | 3.0000  | 0.2985 | 0.5000   | 0.9954 | 0.0000  | 0.0000   | 0.0500   |
| MATH-500-v2 (70B)     | Majority1@K    | $y = \text{floor} + (\text{ceil} - \text{floor}) \cdot \exp(-\zeta \cdot K^{-\alpha}) (1 - (1 - \pi)^{K^\gamma})$ | 0.7747 | 0.8241 | 10.0000  | 2.1272  | 0.0888 | 2.4999   | 0.8560 | 0.0001  | 0.0000   | 0.0500   |
| MATH-500-v2 (70B)     | Naive Ensemble | $y = \text{floor} + (\text{ceil} - \text{floor}) \cdot \exp(-\zeta \cdot K^{-\alpha}) (1 - (1 - \pi)^{K^\gamma})$ | 0.7879 | 0.9221 | 4.2081   | 3.0000  | 0.2789 | 0.5000   | 0.9966 | 0.0000  | 0.0000   | 0.1000   |
| MMLU-Pro-v2 (70B)     | Pass@K         | $y = \text{floor} + (\text{ceil} - \text{floor}) \cdot \exp(-\zeta \cdot K^{-\alpha})$                            | 0.0000 | 0.9785 | 0.3263   | 0.3543  | X      | X        | 0.9959 | 0.0000  | 0.0000   | 0.1000   |
| MMLU-Pro-v2 (70B)     | Weaver         | $y = \text{floor} + (\text{ceil} - \text{floor}) \cdot \exp(-\zeta \cdot K^{-\alpha}) (1 - (1 - \pi)^{K^\gamma})$ | 0.6912 | 0.9148 | 1.5277   | 3.0000  | 0.2765 | 0.5000   | 0.9984 | 0.0000  | 0.0000   | 0.2500   |
| MMLU-Pro-v2 (70B)     | Majority1@K    | $y = \text{floor} + (\text{ceil} - \text{floor}) \cdot \exp(-\zeta \cdot K^{-\alpha}) (1 - (1 - \pi)^{K^\gamma})$ | 0.6923 | 0.7379 | 0.0495   | 1.0001  | 0.1711 | 1.0148   | 0.9481 | 0.0000  | 0.0000   | 0.0500   |
| MMLU-Pro-v2 (70B)     | Naive Ensemble | $y = \text{floor} + (\text{ceil} - \text{floor}) \cdot \exp(-\zeta \cdot K^{-\alpha}) (1 - (1 - \pi)^{K^\gamma})$ | 0.6979 | 0.8907 | 1.8452   | 3.0000  | 0.2327 | 0.5000   | 0.9931 | 0.0000  | 0.0000   | 0.1000   |
| MMLU-College-v2 (70B) | Pass@K         | $y = \text{floor} + (\text{ceil} - \text{floor}) \cdot \exp(-\zeta \cdot K^{-\alpha})$                            | 0.7723 | 0.9655 | 1.3237   | 0.7746  | X      | X        | 0.9987 | 0.0000  | 0.0000   | 0.1000   |
| MMLU-College-v2 (70B) | Weaver         | $y = \text{floor} + (\text{ceil} - \text{floor}) \cdot \exp(-\zeta \cdot K^{-\alpha}) (1 - (1 - \pi)^{K^\gamma})$ | 0.8184 | 0.9436 | 2.2897   | 2.0761  | 0.4148 | 0.5000   | 0.9979 | 0.0000  | 0.0000   | 0.2500   |
| MMLU-College-v2 (70B) | Majority1@K    | $y = \text{floor} + (\text{ceil} - \text{floor}) \cdot \exp(-\zeta \cdot K^{-\alpha}) (1 - (1 - \pi)^{K^\gamma})$ | 0.8196 | 0.8413 | 0.0498   | 1.0001  | 0.2051 | 1.0153   | 0.8814 | 0.0000  | 0.0000   | 0.0100   |
| MMLU-College-v2 (70B) | Naive Ensemble | $y = \text{floor} + (\text{ceil} - \text{floor}) \cdot \exp(-\zeta \cdot K^{-\alpha}) (1 - (1 - \pi)^{K^\gamma})$ | 0.8234 | 0.9262 | 3.9001   | 3.0000  | 0.3036 | 0.5000   | 0.9909 | 0.0000  | 0.0000   | 0.1000   |
| GPQA-v2-Diamond (8B)  | Pass@K         | $y = \text{floor} + (\text{ceil} - \text{floor}) \cdot \exp(-\zeta \cdot K^{-\alpha})$                            | 0.2223 | 0.9976 | 2.4975   | 0.8328  | X      | X        | 0.9996 | 0.0000  | 0.0000   | 0.2500   |
| GPQA-v2-Diamond (8B)  | Weaver         | $y = \text{floor} + (\text{ceil} - \text{floor}) \cdot \exp(-\zeta \cdot K^{-\alpha}) (1 - (1 - \pi)^{K^\gamma})$ | 0.2316 | 0.4678 | 0.0559   | 1.0027  | 0.2347 | 0.5940   | 0.9965 | 0.0000  | 0.0002   | 0.0100   |
| GPQA-v2-Diamond (8B)  | Majority1@K    | $y = \text{floor} + (\text{ceil} - \text{floor}) \cdot \exp(-\zeta \cdot K^{-\alpha}) (1 - (1 - \pi)^{K^\gamma})$ | 0.2773 | 0.2979 | 0.1335   | 0.9633  | 0.0479 | 2.5000   | 0.5476 | 0.0000  | 0.0001   | 0.0500   |
| GPQA-v2-Diamond (8B)  | Naive Ensemble | $y = \text{floor} + (\text{ceil} - \text{floor}) \cdot \exp(-\zeta \cdot K^{-\alpha}) (1 - (1 - \pi)^{K^\gamma})$ | 0.2871 | 0.3845 | 8.5633   | 3.0000  | 0.2431 | 0.5000   | 0.9643 | 0.0000  | 0.0001   | 0.0100   |
| MATH-500-v2 (8B)      | Pass@K         | $y = \text{floor} + (\text{ceil} - \text{floor}) \cdot \exp(-\zeta \cdot K^{-\alpha})$                            | 0.3986 | 1.0000 | 1.6393   | 0.8786  | X      | X        | 0.9976 | 0.0001  | 0.0001   | 0.0100   |
| MATH-500-v2 (8B)      | Weaver         | $y = \text{floor} + (\text{ceil} - \text{floor}) \cdot \exp(-\zeta \cdot K^{-\alpha}) (1 - (1 - \pi)^{K^\gamma})$ | 0.4149 | 0.7417 | 0.0750   | 1.0042  | 0.3261 | 0.5179   | 0.9981 | 0.0000  | 0.0000   | 0.0100   |
| MATH-500-v2 (8B)      | Majority1@K    | $y = \text{floor} + (\text{ceil} - \text{floor}) \cdot \exp(-\zeta \cdot K^{-\alpha}) (1 - (1 - \pi)^{K^\gamma})$ | 0.5061 | 0.6976 | 5.9901   | 1.1205  | 0.0782 | 2.5000   | 0.9960 | 0.0000  | 0.0000   | 0.0500   |
| MATH-500-v2 (8B)      | Naive Ensemble | $y = \text{floor} + (\text{ceil} - \text{floor}) \cdot \exp(-\zeta \cdot K^{-\alpha}) (1 - (1 - \pi)^{K^\gamma})$ | 0.5009 | 0.7342 | 1.6358   | 3.0000  | 0.3321 | 0.5000   | 0.9803 | 0.0001  | 0.0005   | 0.0100   |
| MMLU-Pro-v2 (8B)      | Pass@K         | $y = \text{floor} + (\text{ceil} - \text{floor}) \cdot \exp(-\zeta \cdot K^{-\alpha})$                            | 0.3877 | 1.0000 | 1.8798   | 0.7549  | X      | X        | 0.9990 | 0.0000  | 0.0000   | 0.1000   |
| MMLU-Pro-v2 (8B)      | Weaver         | $y = \text{floor} + (\text{ceil} - \text{floor}) \cdot \exp(-\zeta \cdot K^{-\alpha}) (1 - (1 - \pi)^{K^\gamma})$ | 0.4770 | 0.6937 | 3.1648   | 3.0000  | 0.2172 | 0.5705   | 0.9986 | 0.0000  | 0.0001   | 0.0500   |
| MMLU-Pro-v2 (8B)      | Majority1@K    | $y = \text{floor} + (\text{ceil} - \text{floor}) \cdot \exp(-\zeta \cdot K^{-\alpha}) (1 - (1 - \pi)^{K^\gamma})$ | 0.4663 | 1.0000 | 2.4923   | 0.1016  | 0.0362 | 2.5000   | 0.9600 | 0.0001  | 0.0002   | 0.0500   |
| MMLU-Pro-v2 (8B)      | Naive Ensemble | $y = \text{floor} + (\text{ceil} - \text{floor}) \cdot \exp(-\zeta \cdot K^{-\alpha}) (1 - (1 - \pi)^{K^\gamma})$ | 0.4777 | 0.7207 | 3.0170   | 3.0000  | 0.1613 | 0.5000   | 0.9987 | 0.0000  | 0.0000   | 0.0100   |
| MMLU-College-v2 (8B)  | Pass@K         | $y = \text{floor} + (\text{ceil} - \text{floor}) \cdot \exp(-\zeta \cdot K^{-\alpha})$                            | 0.4442 | 0.9912 | 1.0258   | 0.9265  | X      | X        | 0.9993 | 0.0000  | 0.0000   | 0.5000   |
| MMLU-College-v2 (8B)  | Weaver         | $y = \text{floor} + (\text{ceil} - \text{floor}) \cdot \exp(-\zeta \cdot K^{-\alpha}) (1 - (1 - \pi)^{K^\gamma})$ | 0.6178 | 0.8447 | 1.1473   | 3.0000  | 0.3523 | 0.5000   | 0.9957 | 0.0000  | 0.0001   | 0.2500   |
| MMLU-College-v2 (8B)  | Majority1@K    | $y = \text{floor} + (\text{ceil} - \text{floor}) \cdot \exp(-\zeta \cdot K^{-\alpha}) (1 - (1 - \pi)^{K^\gamma})$ | 0.6254 | 0.7186 | 0.5765   | 0.9281  | 0.2058 | 1.2287   | 0.9736 | 0.0000  | 0.0001   | 0.0100   |
| MMLU-College-v2 (8B)  | Naive Ensemble | $y = \text{floor} + (\text{ceil} - \text{floor}) \cdot \exp(-\zeta \cdot K^{-\alpha}) (1 - (1 - \pi)^{K^\gamma})$ | 0.6074 | 0.9813 | 1.2560   | 0.1636  | 0.3060 | 2.4651   | 0.9988 | 0.0000  | 0.0000   | 0.0100   |

Table 18: **WEAVER with 8B Models Exceeds Majority Voting and Naive Ensemble across All Datasets:** Candidate are generated with Llama 3.1 8B Instruct while the weak verifiers are 8B parameters or smaller in size.

|           | Methodology                              | Generations ( $K$ ) | Datasets |       |              |          | Average      |
|-----------|------------------------------------------|---------------------|----------|-------|--------------|----------|--------------|
|           |                                          |                     | MATH 500 | GPQA  | MMLU College | MMLU Pro |              |
| Baselines | First Sample                             | 1                   | 49.8%    | 28.3% | 64.1%        | 46.6%    | 47.2%        |
|           | Majority Voting                          | 100                 | 69.0%    | 30.5% | 72.7%        | 56.4%    | <b>57.2%</b> |
|           | Top-Ranked RM from RewardBench [39]      | 100                 | 73.8%    | 25.4% | 70.1%        | 53.4%    | 55.7%        |
|           | Top-10 RM Ensemble from RewardBench [39] | 100                 | 70.2%    | 22.1% | 73.9%        | 49.4%    | 53.9%        |
|           | Multi-Agent Verification [41]            | 100                 | 65.4%    | 31.4% | 70.5%        | 55.2%    | 55.6%        |
|           | Self-Verification [93]                   | 100                 | 71.4%    | 32.2% | 70.4%        | 53.0%    | <u>56.8%</u> |
|           | WEAVER                                   | 100                 | 80.0%    | 47.1% | 85.7%        | 67.2%    | <b>70.0%</b> |
|           | GPT-4o-mini                              | 1                   | 76.8%    | 38.4% | 82.2%        | 61.8%    | 64.8%        |
|           | Claude 3.5 Haiku                         | 1                   | 70.0%    | 36.4% | 75.9%        | 65.2%    | 61.9%        |
|           | Oracle Verifier (Pass@100)               | 100                 | 99.2%    | 95.2% | 98.5%        | 96.8%    | <b>97.4%</b> |

#### 1223 C.4 Scaling Candidate Generations

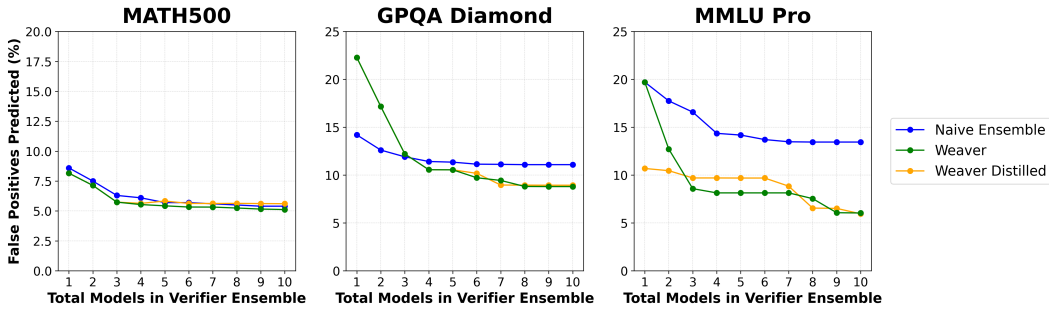

Figure 12: False Positive Rates across Verification Systems

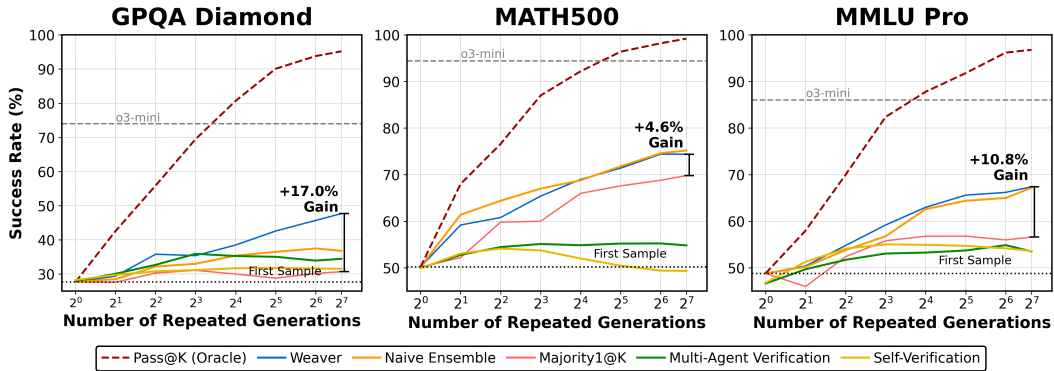

Figure 13: WEAVER Scaling - 8B Generations and Models

#### 1224 C.5 Scaling Verifier Count

1225 In Table 19, we include results of scaling verifier scores. We note that for Reward Models, which  
1226 are typically deterministic [39, 71], multiple scores must be obtained by varying the prompt; for LM  
1227 Judges, we can vary either the prompt or the sampling temperature to generate diverse outputs from the  
1228 same model (Table 19). We find that for both types of weak verifiers, reward models and LLM judges,  
1229 scaling the number of models yields better performance than sampling multiple evaluations from the  
1230 same model via prompt tuning or temperature variation. However, we note that these approaches are  
1231 complementary.

Table 19: **Ensembling with Multiple Verifiers Outperforms Increased Sampling with Single Verifier:** Candidate responses are generated with Llama 3.3 70B Instruct while the weak verifiers range in size from 8B to 72B parameters. For details on prompting, please see Appendix C.7.

| Methodology                             | Benchmarks   |              |              |
|-----------------------------------------|--------------|--------------|--------------|
|                                         | MATH500      | GPQA         | MMLU Pro     |
| First Sample                            | 78.0%        | 42.9%        | 69.9%        |
| Majority Voting                         | 83.0%        | 47.4%        | 74.4%        |
| Best Reward Model (1 Score)             | 94.4%        | 58.4%        | 81.8%        |
| Best Reward Model (5 Scores, 5 Prompts) | 93.2%        | 55.3%        | 82.5%        |
| Top-5 Most Accurate Reward Models       | <b>95.4%</b> | <u>64.1%</u> | <b>87.3%</b> |
| Best LM Judge (1 Score)                 | 90.2%        | 61.1%        | 79.5%        |
| Best LM Judge (5 Scores, 5 Prompts)     | 88.1%        | 57.2%        | 80.8%        |
| Top-5 Most Accurate LM Judges           | <u>93.4%</u> | <b>65.2%</b> | <u>85.4%</u> |

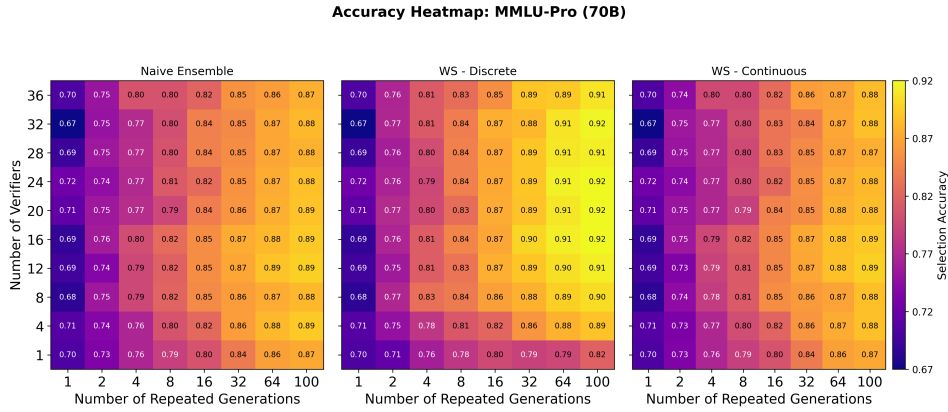

Figure 14: **WEAVER Performance Improvements from Scaling Generations and Verifiers:** Increased candidate generations and weak verifiers available generally improves performance.

When breaking down weak verifiers into RMs or LM Judges, individually, we find that additional LMs leads average gains of 5.4% and 6.1%, respectively (Table 19). In contrast, sampling additional scores from a single RM or LM judge yields only 0.8% and 1.1% gains on average. These results suggest that leveraging the complementary strengths of multiple verifiers can be more effective than eliciting multiple judgments from a single verifier. Appx. C.7 provides additional details on the verifier prompting. Finally, Figure 14 illustrates the tradeoff of scaling the number of verifiers versus increasing the number of scores from a single verifier, showing that scaling verifiers is helpful when the coverage increases as we increase sample count.

In Fig. 14 illustrates how the number of verifiers and repeated generations interact to influence success rate. We observe that increasing the number of generations tends to be more effective than increasing the number of verifiers alone—but only when paired with the right verification strategy. For example, naive ensembling of verifiers plateaus in performance even as more generations are added, whereas WEAVER continues to improve with both axes. This highlights that generation diversity is a stronger driver of performance than verifier count alone, and that weak supervision methods like WEAVER are essential to fully leverage this diversity. We illustrate the verification generation tradeoff for additional datasets in Appendix C.3.



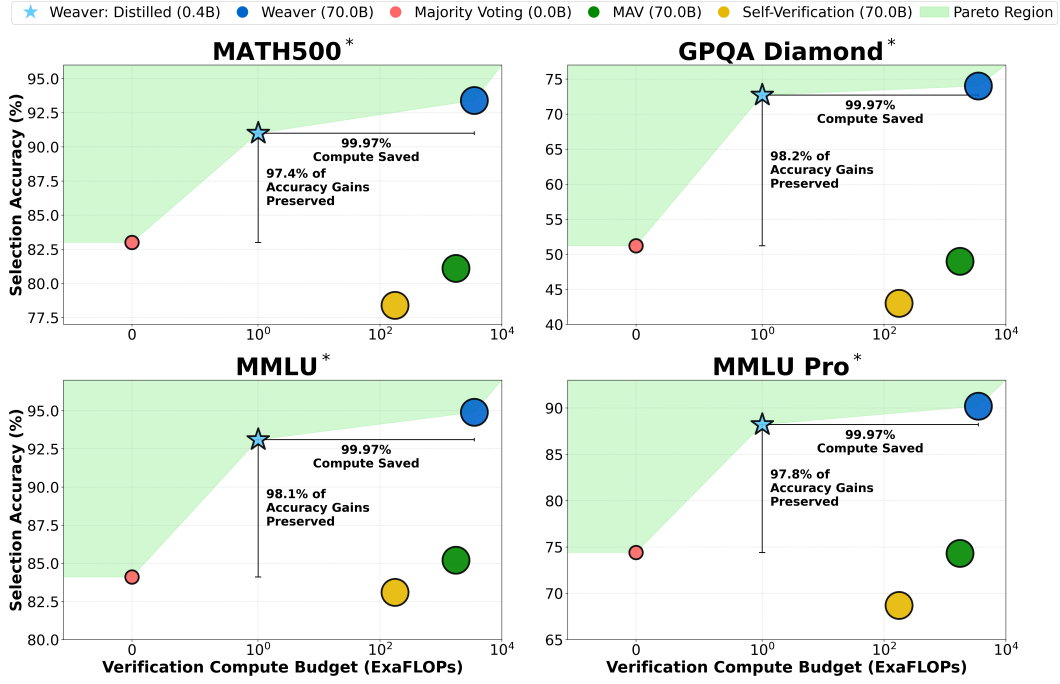

Figure 16: WEAVER Distilled - Pareto Frontiers: \*We train/evaluate on an 80:20 split.

## 1248 C.6 WEAVER Distillation

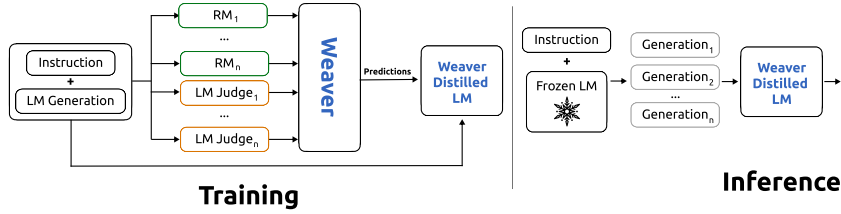

Figure 15: Overview of WEAVER Distillation (Section 6)

1249 For the loss function in WEAVER distillation, we utilized cross-entropy loss with Adam [35]. Our  
 1250 classification architecture comprises a single linear classification layer with 0.1 dropout applied to the  
 1251 input, which consists of the final hidden state from the  $[CLS]$  token. Regarding learning dynamics, we  
 1252 implemented linear warmup and linear decay via the Sentence-Transformers library [61], employing a  
 1253 learning rate of  $5e-6$  and training batch size of 64 across all experimental setups.

## 1254 C.7 Individual Verifier Optimization

1255 While WEAVER primarily focuses on aggregating multiple weak verifiers to improve overall verification  
1256 quality, this appendix explores complementary techniques for optimizing individual verifiers. As  
1257 mentioned earlier in the paper, existing weak verifiers often suffer from high false positive rates [73],  
1258 which can limit their effectiveness, even within an ensemble.

1259 As we scale the number of repeated samples and employ multiple verifiers, the precision of each  
1260 individual verifier becomes increasingly important relative to recall. When many candidate solutions  
1261 are available, a verifier can afford to miss some correct solutions (false negatives) as long as its positive  
1262 predictions are highly reliable (high precision).

1263 This observation motivates exploring methods to enhance individual verifier quality through methods  
1264 such as prompt optimization — tailoring verifier prompts to maximize performance, particularly  
1265 precision, with minimal or no labeled data.

### 1266 C.7.1 LM Judge Prompt Optimization

1267 LM judges often suffer from biases such as position bias (favoring answers in certain positions),  
1268 verbosity bias (preferring longer answers), and self-enhancement bias (preferring answers similar to  
1269 their own generation patterns) [40, 95], suggesting sensitivity to system and input prompt design.

1270 Throughout our WEAVER experiments, we used fixed, manually engineered prompts for our LM judge  
1271 verifiers. However, optimizing these prompts could potentially improve individual verifier precision  
1272 and reliability. Multi-Agent Verification [41] demonstrates this by crafting specialized prompts for  
1273 specific verification aspects.

1274 We explored systematically optimizing verifier prompts using DSPy [34], an open-source library that  
1275 provides algorithms for optimizing language model prompts through discrete search over prompt  
1276 candidates guided by a metric function. DSPy optimization works by generating, evaluating, and  
1277 refining prompts that maximize task performance on a small labeled dataset.

1278 **Experimental Setup:** We investigate two dimensions of prompt optimization: (1) **optimization space**  
1279 **scaling**, where we progressively expand what the optimizer can modify from system instruction only  
1280 (0-shot) to including 3 demonstrations (3-shot) and 5 demonstrations (5-shot); and (2) **training data**  
1281 **size scaling**, where we vary labeled data from 1% to 16% to determine how much data is necessary for  
1282 effective prompt optimization.

1283 Our experimental setup uses training examples containing instruction-generation pairs. Since our  
1284 datasets have multiple generations per instruction (up to 100), we group examples by instruction before  
1285 splitting to prevent data leakage between train and validation sets. We hold out 50% of the dataset  
1286 instructions (each paired with 100 candidate generations) for evaluation. For the optimization space  
1287 scaling experiment, we randomly select  $n$  generations such that  $n \times \text{len}(\text{dataset})/2 = 250$ , maximizing  
1288 training set diversity while maintaining a fixed training set size. For the data scaling experiment, we  
1289 train on different percentages (1%, 2%, 4%, and 16%) of the dataset by calculating the number of  
1290 instructions as  $\lceil \text{num\_problems\_in\_dataset} \times (\text{train\_percentage}/100) \rceil$  and selecting repeated samples  
1291 for each instruction with  $\text{samples} = \min(\max(4, \text{num\_problems} \times 2), 20)$  to avoid overfitting. We use  
1292 a consistent random seed to ensure identical dataset splits between optimization runs.

1293 **Results:** Figure 17 shows results across different datasets and optimization configurations. While we  
1294 don’t observe clear scaling relationships across all datasets (possibly due to the increased stochasticity  
1295 of LLM-based optimization), we observe an average precision gain of 3.8% of the best judge over the  
1296 Chain of Thought (CoT) baseline judge. MATH 500 shows the largest jump in precision of 9% and  
1297 shows clear improvement in precision as the optimization space is scaled.

1298 The scaling behavior with training data size (Figure 18) shows slight log-linear improvements in  
1299 precision as we increase training data, though gains differ by dataset. MMLU-College shows minimal  
1300 benefit from additional data, while the remaining datasets see an average boost of 3.2% in precision  
1301 when scaling the training data size from 1% to 16% of the original dataset.

1302 (Figure 19) reveals that optimized prompts often improve both precision and accuracy by reducing  
1303 false positive rates - essentially making judges more conservative in their correctness assessments.  
1304 This is particularly valuable in the repeated sampling regime, where higher precision improves overall  
1305 verification quality.

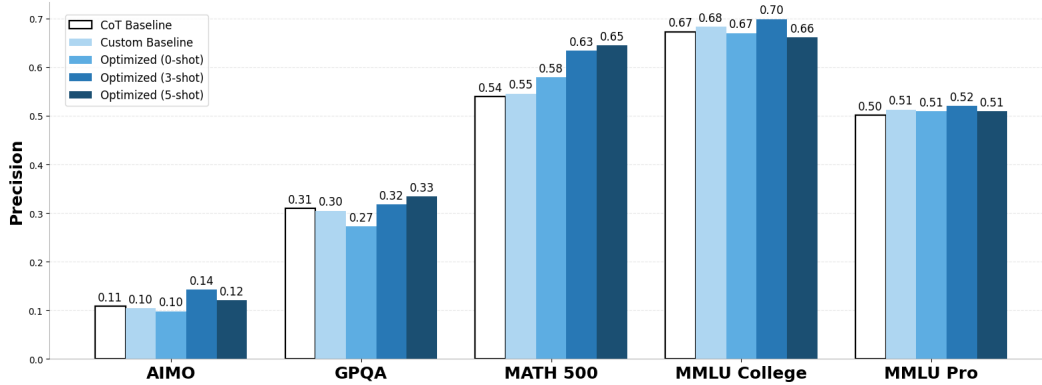

Figure 17: **LM judge prompt optimization using 250 labeled examples consistently yields precision gains.** Baseline methods (CoT and Custom) are compared against DSPy-optimized prompts with varying numbers of demonstrations (0-shot, 3-shot, and 5-shot).

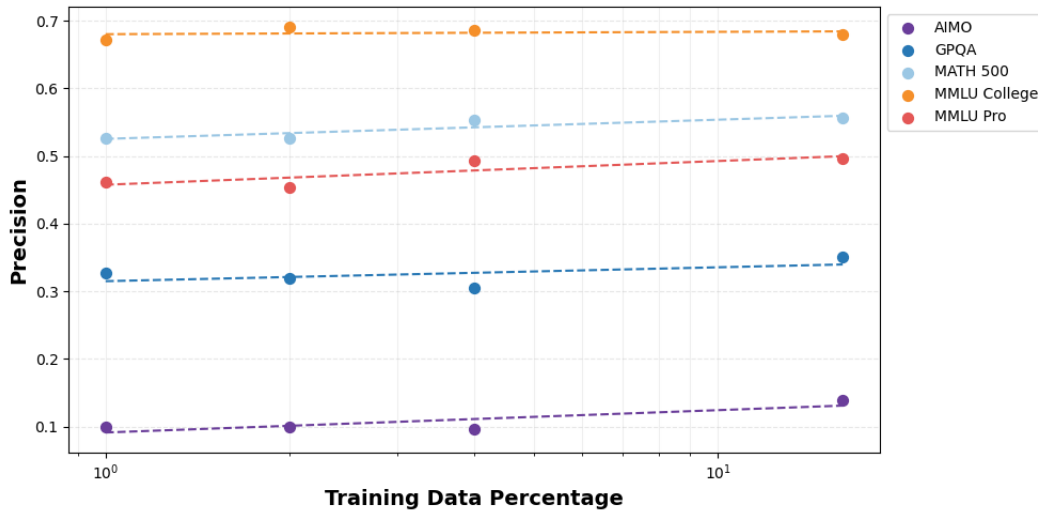

Figure 18: **Scaling LM judge prompt optimization training data leads to modest precision gains.** The x-axis shows the percentage of training data used (log scale), and the y-axis shows precision.

1306 These findings suggest that prompt optimization can be a valuable complement to WEAVER’s aggregation  
 1307 approach. Even with limited labeled data, targeted prompt engineering can enhance individual  
 1308 verifier quality, benefiting the ensemble as a whole. Further research is needed to define a more  
 1309 systematic recipe for verifier prompt optimization. Additionally, it remains a question of whether we  
 1310 can extend prompt optimization to discriminative reward models to enjoy similar gains in performance.

## 1311 D Miscellaneous

### 1312 D.1 Compute Requirements

1313 **Hardware Infrastructure.** Our experiments were conducted using 4 compute nodes, each equipped  
 1314 with 8 NVIDIA H100 GPUs (80GB HBM3 memory per GPU), for a total of 32 H100 GPUs. Each  
 1315 node was configured with high-bandwidth NVLink connections between GPUs and inter-node commu-  
 1316 nication was facilitated via NVIDIA NVLink Switch System to minimize communication overhead  
 1317 during distributed training and inference.

1318 **Model Parallelism and Distribution.** For our 72B parameter language models, we employed a hybrid  
 1319 parallelism strategy combining tensor parallelism, pipeline parallelism, and data parallelism:

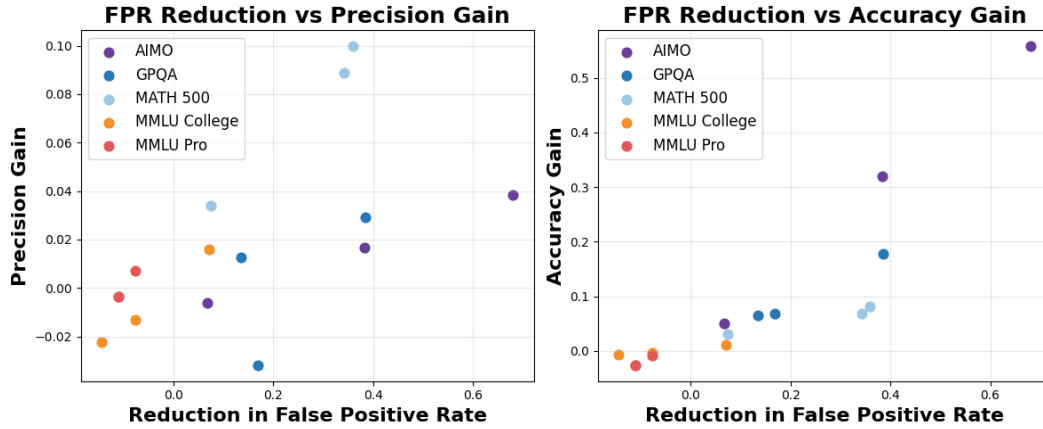

Figure 19: Optimized prompts often improve LM judge performance by reducing false positive rates.

- 8-way tensor parallelism across GPUs within each node
- 4-way pipeline parallelism across nodes
- Data parallelism for batch processing

**Storage Requirements.** Processing datasets of 100GB+ required significant storage infrastructure:

- 4TB NVMe SSDs per node for dataset caching and checkpoints
- 100TB shared network storage for full dataset repository

**Software Stack.** Our experiments were powered by:

- NVIDIA CUDA 12.2
- PyTorch 2.1 with NVIDIA NCCL for distributed communication
- DeepSpeed ZeRO Stage 3 for memory optimization
- Distributed data loading with webdataset format for efficient streaming
